# Supplementary material for: Molecular characterization of low-grade serous ovarian carcinoma identifies genomic aberrations according to hormone receptor expression
Source: PubMed Central journal article supplement (PMC9242985; doi:10.1038/s41698-022-00288-2), 2022-06-29
Supplement: 41698_2022_288_MOESM1_ESM.pdf [file 41698_2022_288_MOESM1_ESM.pdf]

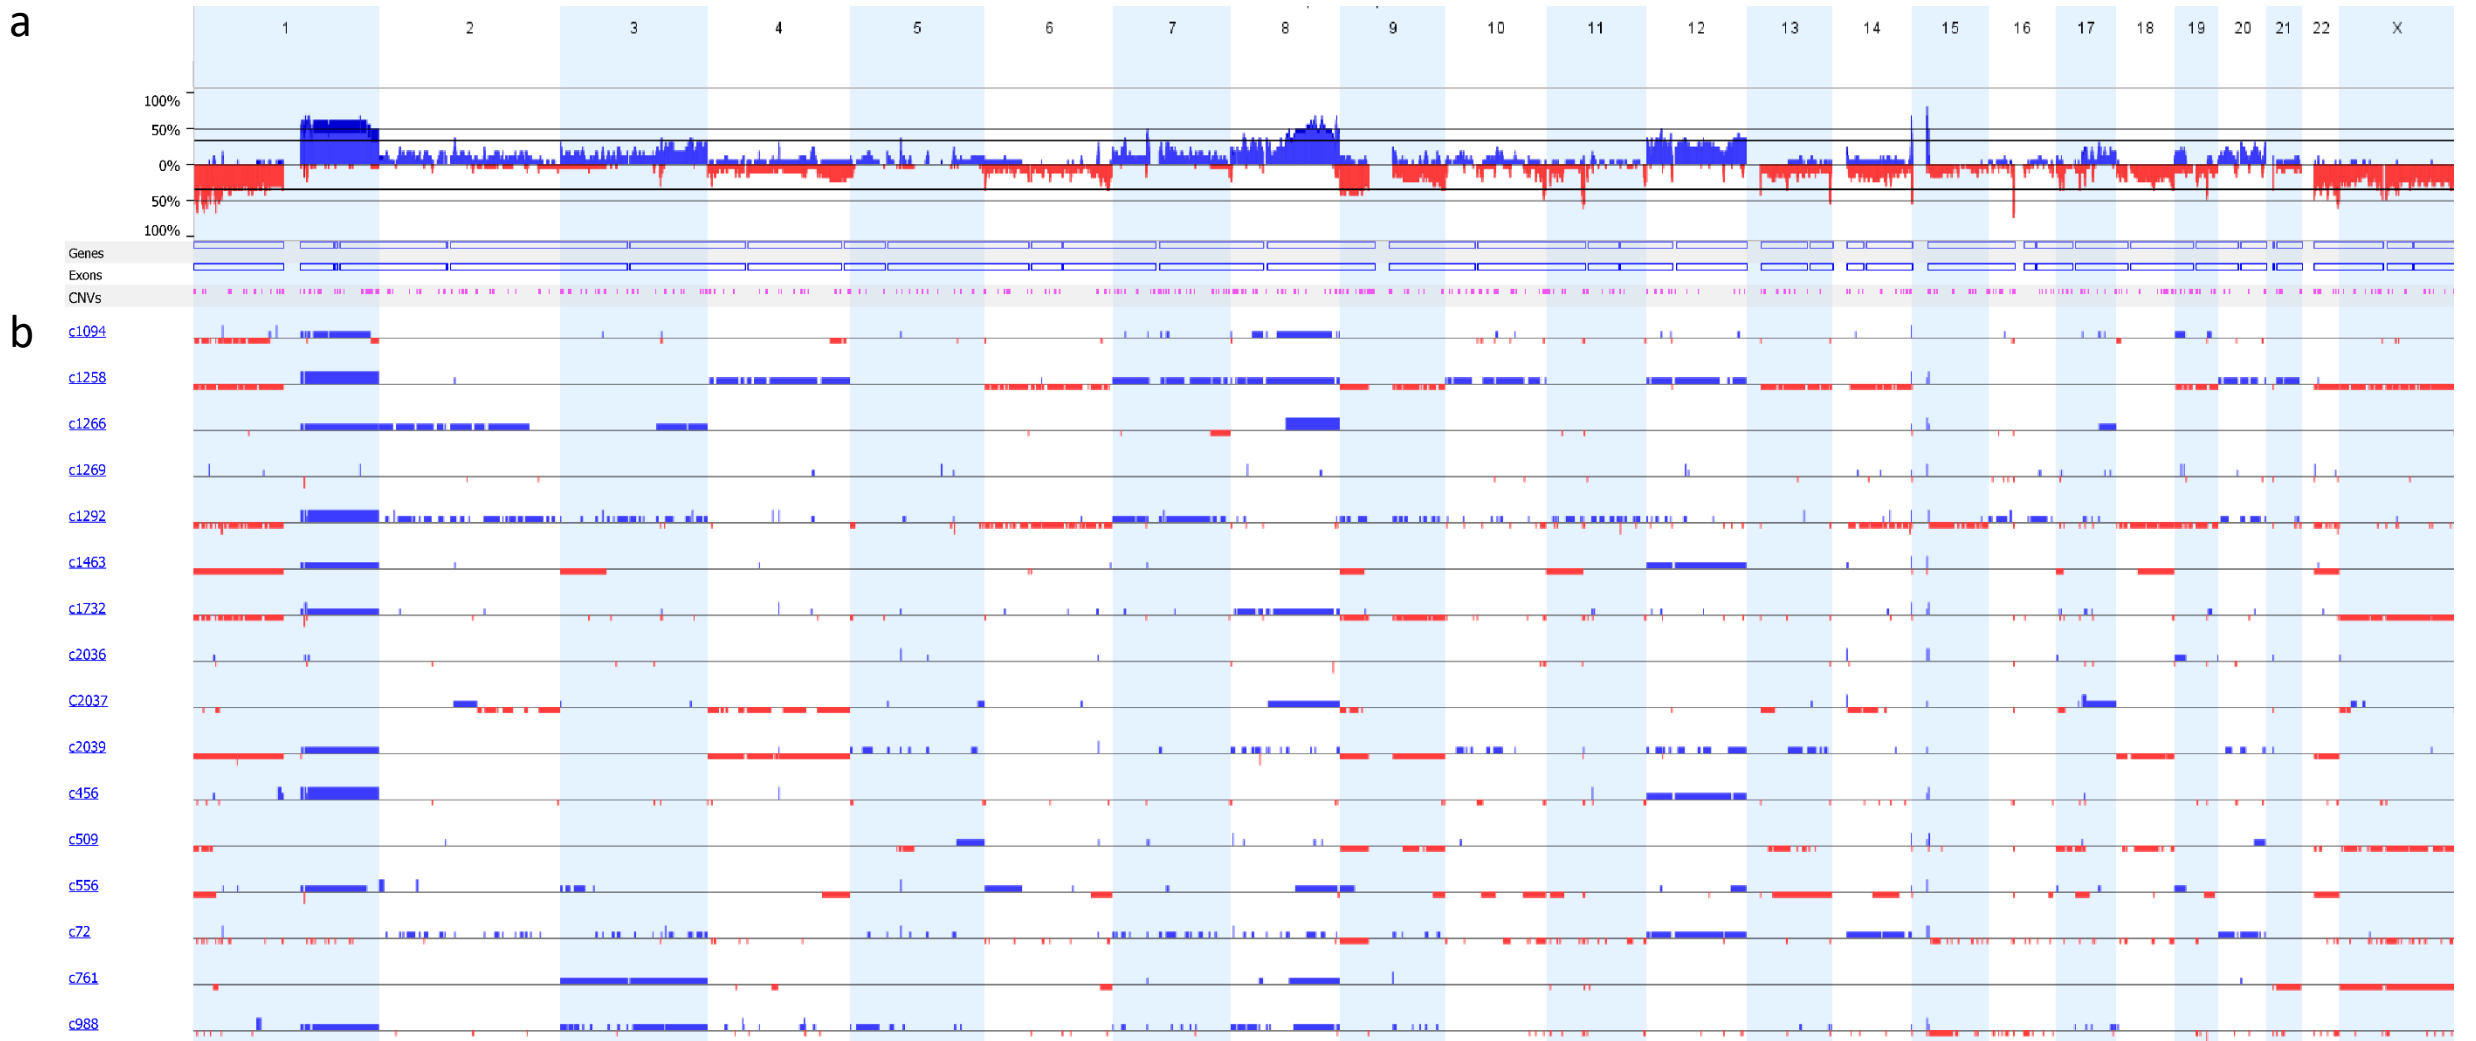

Supplementary figure 1. Copy number analysis of each individual ER-low expressing low-grade serous ovarian carcinoma. (a) The frequency of global copy number changes across each chromosome is shown for combined ER-low cancers (n=16). Copy number gains and losses are shown for each of the 16 ER-low cancers. Individual COEUR sample IDs are shown in the left column. Copy number gain is highlighted in blue, and copy number loss highlighted in red

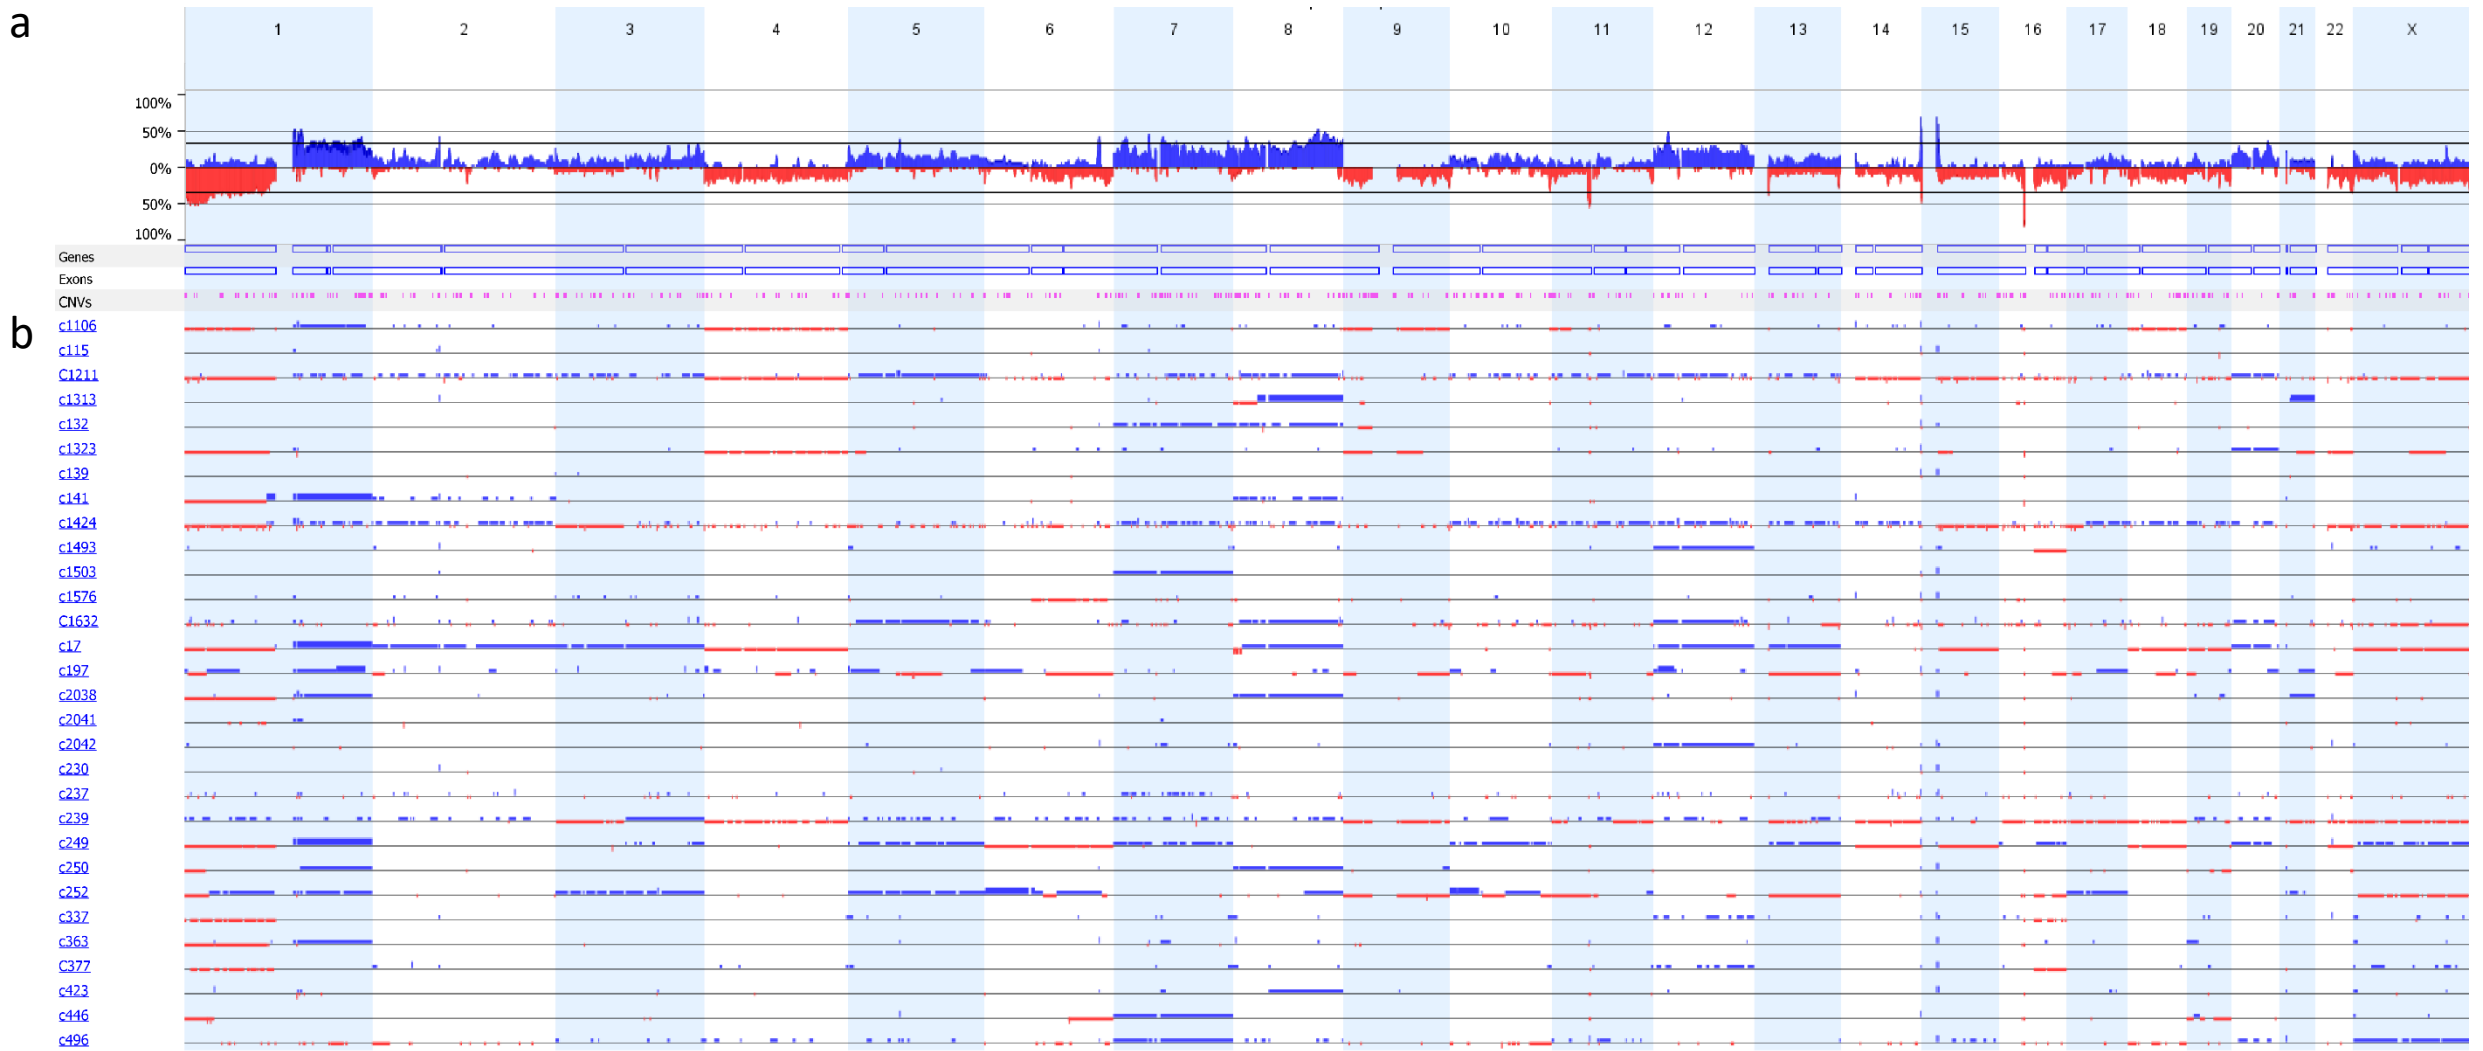

Supplementary figure 2. Copy number analysis of each individual ER-high expressing low-grade serous ovarian carcinoma. (a) The frequency of global copy number changes across each chromosome is shown for combined ER-high cancers (n=30). Copy number gains and losses are shown for each of the 30 ER-high cancers. Individual COEUR sample IDs are shown in the left column. Copy number gain is highlighted in blue, and copy number loss highlighted in red

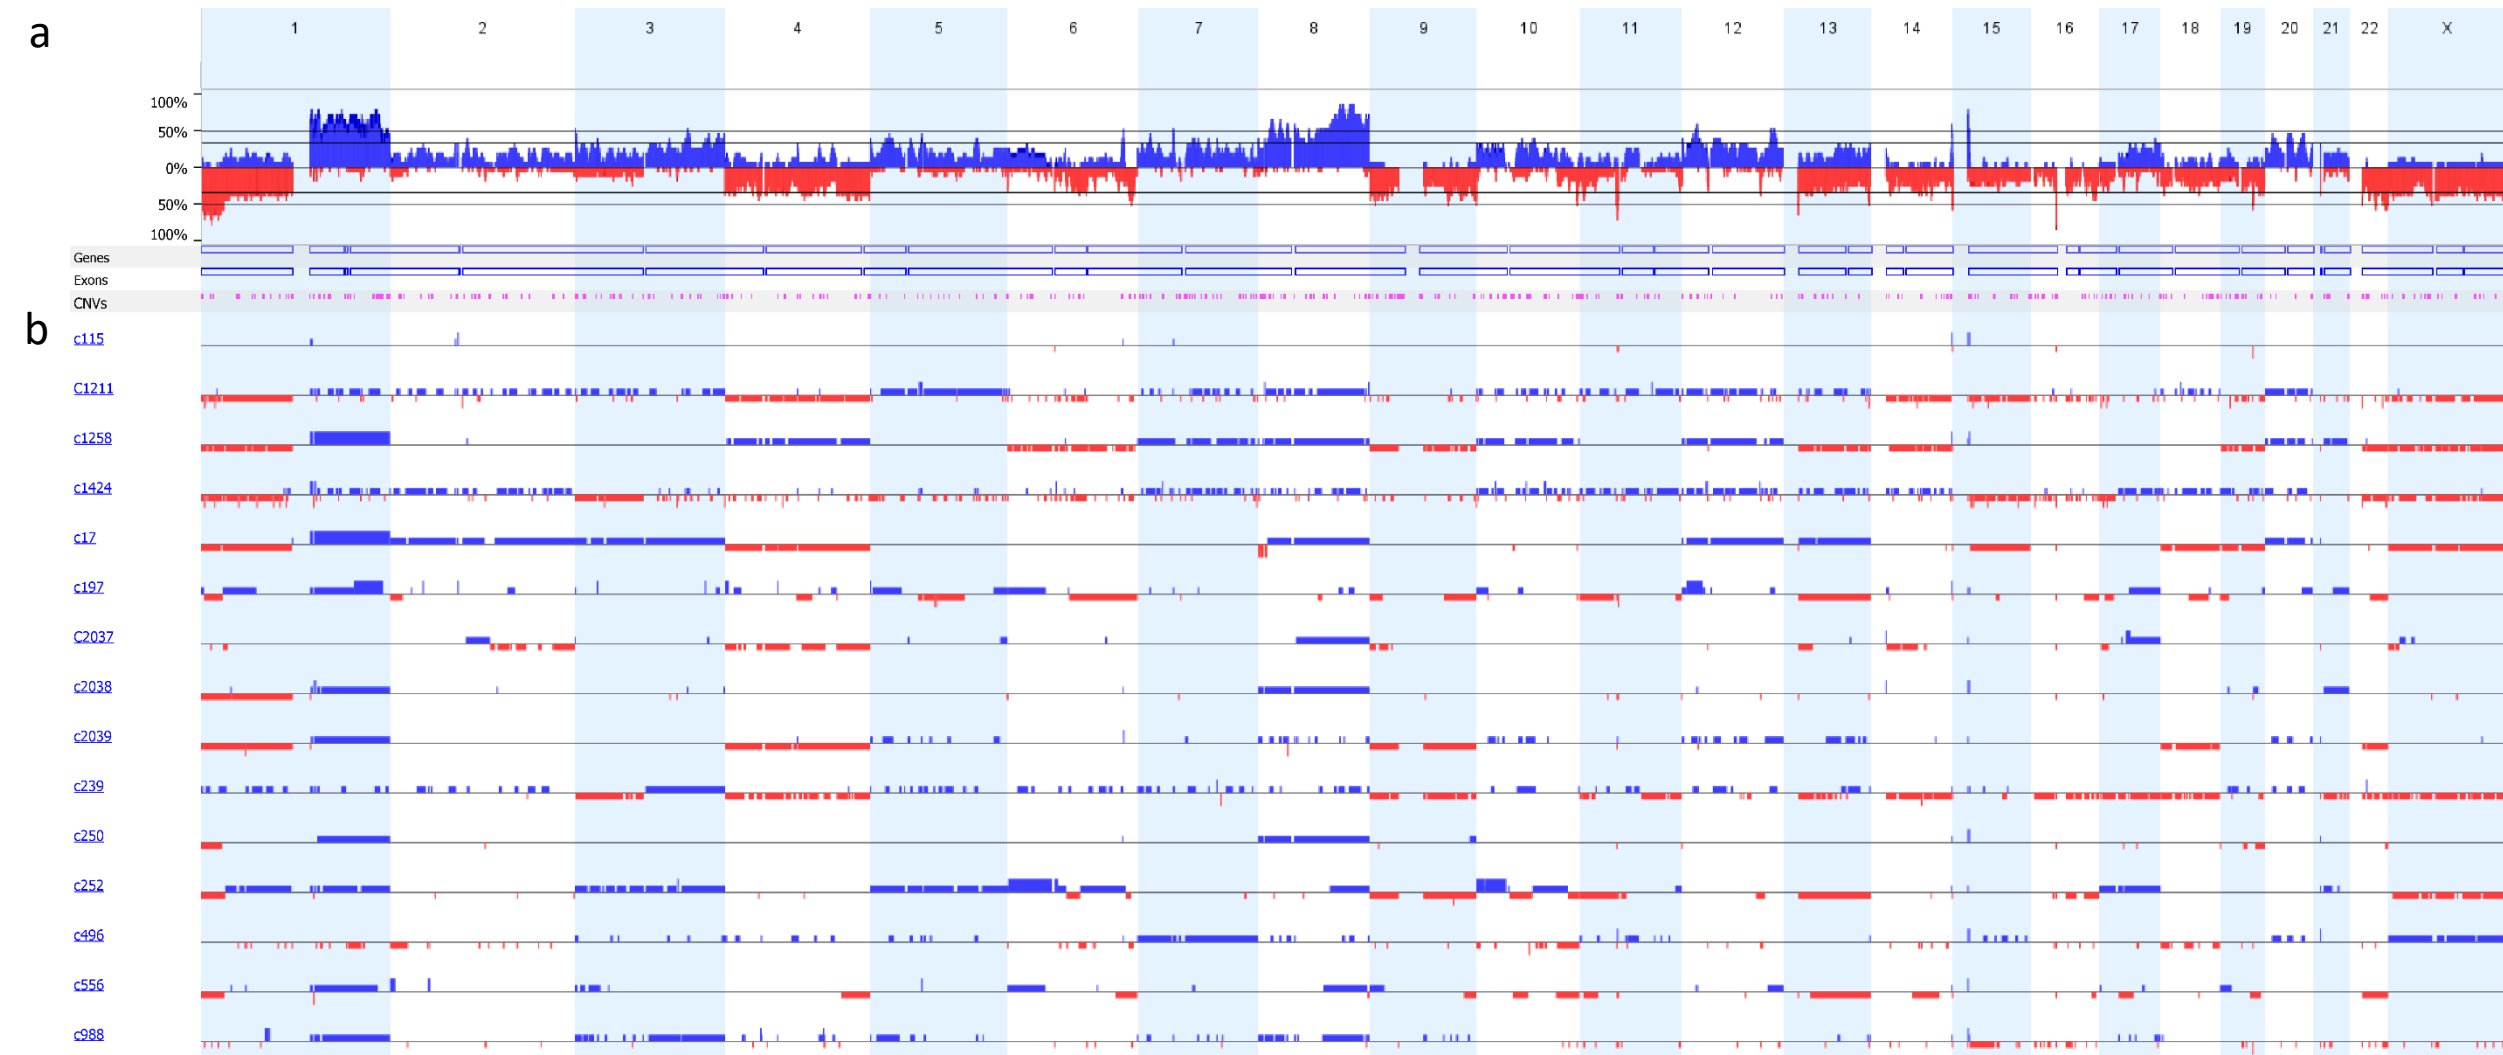

Supplementary figure 3. Copy number analysis of each individual PR-low expressing low-grade serous ovarian carcinoma. (a) The frequency of global copy number changes across each chromosome is shown for combined PR-low cancers (n=15). Copy number gains and losses are shown for each of the 15 PR-low cancers. Individual COEUR sample IDs are shown in the left column. Copy number gain is highlighted in blue, and copy number loss highlighted in red

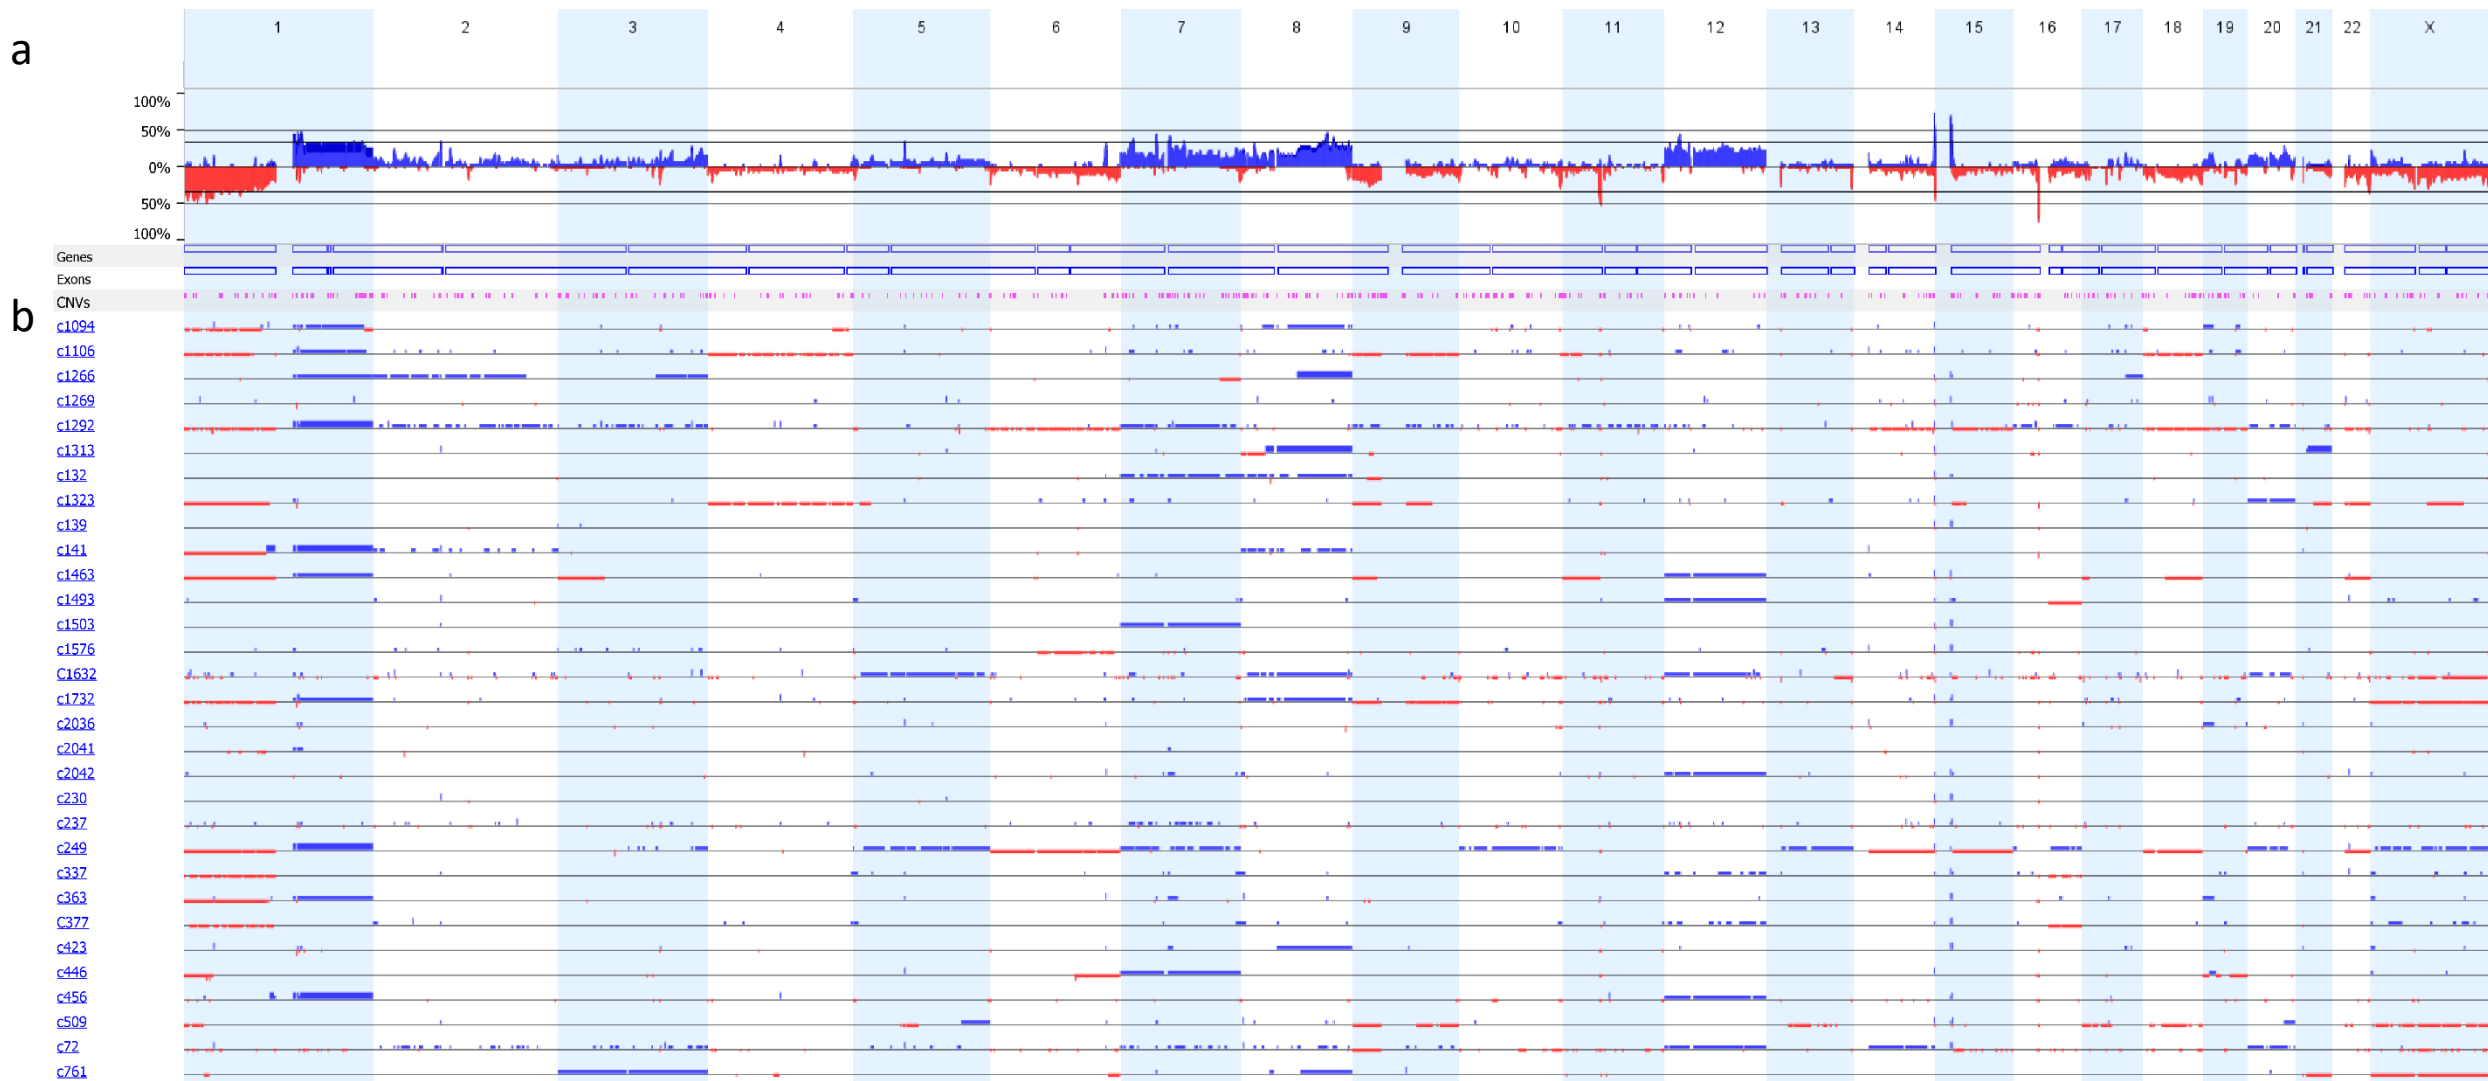

Supplementary figure 4. Copy number analysis of each individual PR-high expressing low-grade serous ovarian carcinoma. (a) The frequency of global copy number changes across each chromosome is shown for combined PR-high cancers (n=31). Copy number gains and losses are shown for each of the 31 PR-high cancers. Individual COEUR sample IDs are shown in the left column. Copy number gain is highlighted in blue, and copy number loss highlighted in red

**Supplementary table 1. Fraction of the genome altered score**

| COEUR sample ID | ER Allred score | PR Allred score | Fraction of the genome altered |
|-----------------|-----------------|-----------------|--------------------------------|
| c1424           | High            | Low             | 54.65%                         |
| c1211           | High            | Low             | 53.93%                         |
| c239            | High            | Low             | 52.65%                         |
| c1258           | Low             | Low             | 51.16%                         |
| c17             | High            | Low             | 47.72%                         |
| c249            | High            | High            | 45.54%                         |
| c1292           | Low             | High            | 43.22%                         |
| c252            | High            | Low             | 41.99%                         |
| c197            | High            | Low             | 33.66%                         |
| c1632           | High            | High            | 31.63%                         |
| c2039           | Low             | Low             | 27.27%                         |
| c72             | Low             | High            | 25.72%                         |
| c556            | Low             | Low             | 23.45%                         |
| c496            | High            | Low             | 22.12%                         |
| c1323           | High            | High            | 21.88%                         |
| c1106           | High            | High            | 19.58%                         |
| c1463           | Low             | High            | 18.77%                         |
| c1732           | Low             | High            | 18.76%                         |
| c988            | Low             | Low             | 18.36%                         |
| c509            | Low             | High            | 16.52%                         |
| c2037           | Low             | Low             | 15.99%                         |
| c761            | Low             | High            | 14.99%                         |
| c2038           | High            | Low             | 12.78%                         |
| c1266           | Low             | High            | 10.94%                         |
| c1094           | Low             | High            | 10.84%                         |
| c446            | High            | High            | 10.38%                         |
| c456            | Low             | High            | 9.26%                          |
| c250            | High            | Low             | 9.09%                          |
| c377            | High            | High            | 8.91%                          |
| c141            | High            | High            | 8.23%                          |
| c1313           | High            | High            | 8.19%                          |
| c132            | High            | High            | 8.16%                          |
| c1493           | High            | High            | 7.65%                          |
| c337            | High            | High            | 7.56%                          |
| c237            | High            | High            | 7.44%                          |
| c363            | High            | High            | 6.52%                          |
| c2042           | High            | High            | 6.10%                          |
| c1576           | High            | High            | 5.11%                          |
| c423            | High            | High            | 4.57%                          |
| c1503           | High            | High            | 4.37%                          |
| c2036           | Low             | High            | 2.82%                          |
| c1269           | Low             | High            | 2.45%                          |
| c2041           | High            | High            | 1.12%                          |
| c115            | High            | Low             | 0.46%                          |
| c139            | High            | High            | 0.44%                          |
| c230            | High            | High            | 0.31%                          |

**Supplementary table 2.** Comparative loci differences PR low to PR high expression groups.

The frequency of global copy number changes was scored comparing PR-low to PR-high cancers. CN gains and losses (referred to as CN event) that were statistically significantly different between PR-low to PR-high cancers are shown (thresholds of p<0.05 and at least 25% frequency difference). Associated chromosome number, genome location according to the human reference (GRCh38) genome build, cytoband location and length on CN event is shown. The count on the number of genes affected within regions of significant CN differences is shown. Additionally, the count on the number of affected cancer genes and their symbols are shown, which were identified through matching to the Cosmic database of known oncogenes and tumour suppressor genes

| Region                        | Cytoband Location | CN Event | Region Length of CN Event | Freq. in PR Low (%) | Freq. in PR High (%) | Difference | p-value | Count of Gene Symbols | Count of Cosmic Cancer Gene Symbols | List of affected cancer genes |
|-------------------------------|-------------------|----------|---------------------------|---------------------|----------------------|------------|---------|-----------------------|-------------------------------------|-------------------------------|
| chr3:1,550,000-1,700,000      | p26.3             | CN Gain  | 150000                    | 53                  | 3                    | 50         | 0.000   | 0                     | 0                                   |                               |
| chr13:35,375,000-36,550,000   | q13.2 - q13.3     | CN Loss  | 1175000                   | 40                  | 0                    | 40         | 0.001   | 4                     | 1                                   | NBEA                          |
| chr4:156,250,000-157,250,000  | q32.1             | CN Loss  | 1000000                   | 40                  | 0                    | 40         | 0.001   | 7                     | 0                                   |                               |
| chr4:158,300,000-159,300,000  | q32.1             | CN Loss  | 1000000                   | 40                  | 0                    | 40         | 0.001   | 4                     | 0                                   |                               |
| chr4:180,350,000-180,850,000  | q34.3             | CN Loss  | 500000                    | 40                  | 0                    | 40         | 0.001   | 0                     | 0                                   |                               |
| chr13:20,050,000-20,100,000   | q12.11            | CN Loss  | 50000                     | 53                  | 6                    | 47         | 0.001   | 1                     | 0                                   |                               |
| chr3:1,250,000-1,550,000      | p26.3             | CN Gain  | 300000                    | 53                  | 6                    | 47         | 0.001   | 1                     | 0                                   |                               |
| chr3:1,700,000-2,050,000      | p26.3             | CN Gain  | 350000                    | 47                  | 3                    | 43         | 0.001   | 0                     | 0                                   |                               |
| chr4:161,600,000-162,800,000  | q32.1 - q32.2     | CN Loss  | 1200000                   | 47                  | 3                    | 43         | 0.001   | 1                     | 0                                   |                               |
| chr8:119,750,000-120,750,000  | q24.12            | CN Gain  | 1000000                   | 87                  | 32                   | 54         | 0.001   | 9                     | 0                                   |                               |
| chr8:123,200,000-126,750,000  | q24.13            | CN Gain  | 3550000                   | 87                  | 32                   | 54         | 0.001   | 40                    | 0                                   |                               |
| chr8:107,150,000-108,450,000  | q23.1             | CN Gain  | 1300000                   | 87                  | 35                   | 51         | 0.001   | 3                     | 0                                   |                               |
| chr8:110,400,000-111,150,000  | q23.1 - q23.2     | CN Gain  | 750000                    | 87                  | 35                   | 51         | 0.001   | 5                     | 0                                   |                               |
| chr8:16,150,000-16,600,000    | p22               | CN Gain  | 450000                    | 60                  | 13                   | 47         | 0.002   | 0                     | 0                                   |                               |
| chr8:20,200,000-20,250,000    | p21.3             | CN Gain  | 50000                     | 60                  | 13                   | 47         | 0.002   | 0                     | 0                                   |                               |
| chr10:15,450,000-15,500,000   | p13               | CN Gain  | 50000                     | 33                  | 0                    | 33         | 0.002   | 0                     | 0                                   |                               |
| chr10:7,850,000-7,950,000     | p14               | CN Gain  | 100000                    | 33                  | 0                    | 33         | 0.002   | 1                     | 0                                   |                               |
| chr12:104,050,000-104,100,000 | q23.3             | CN Loss  | 50000                     | 33                  | 0                    | 33         | 0.002   | 1                     | 0                                   |                               |
| chr13:23,100,000-28,950,000   | q12.11 - q12.3    | CN Loss  | 5850000                   | 33                  | 0                    | 33         | 0.002   | 58                    | 2                                   | CDX2, FLT3                    |
| chr13:59,150,000-64,900,000   | q21.1 - q21.31    | CN Loss  | 5750000                   | 33                  | 0                    | 33         | 0.002   | 20                    | 0                                   |                               |
| chr13:69,650,000-70,300,000   | q21.33            | CN Loss  | 650000                    | 33                  | 0                    | 33         | 0.002   | 2                     | 0                                   |                               |
| chr13:82,300,000-83,700,000   | q31.1             | CN Loss  | 1400000                   | 33                  | 0                    | 33         | 0.002   | 0                     | 0                                   |                               |
| chr17:12,700,000-12,850,000   | p12               | CN Loss  | 150000                    | 33                  | 0                    | 33         | 0.002   | 2                     | 0                                   |                               |
| chr4:117,350,000-119,150,000  | q26               | CN Loss  | 1800000                   | 33                  | 0                    | 33         | 0.002   | 6                     | 0                                   |                               |
| chr4:120,450,000-121,050,000  | q26 - q27         | CN Loss  | 600000                    | 33                  | 0                    | 33         | 0.002   | 4                     | 0                                   |                               |
| chr4:157,250,000-158,300,000  | q32.1             | CN Loss  | 1050000                   | 33                  | 0                    | 33         | 0.002   | 3                     | 0                                   |                               |
| chr6:24,250,000-25,950,000    | p22.3 - p22.2     | CN Gain  | 1700000                   | 33                  | 0                    | 33         | 0.002   | 23                    | 0                                   |                               |
| chr13:20,000,000-20,050,000   | q12.11            | CN Loss  | 50000                     | 53                  | 10                   | 44         | 0.002   | 1                     | 0                                   |                               |
| chr3:950,000-1,250,000        | p26.3             | CN Gain  | 300000                    | 53                  | 10                   | 44         | 0.002   | 1                     | 0                                   |                               |
| chr8:143,150,000-143,450,000  | q24.3             | CN Gain  | 300000                    | 67                  | 19                   | 47         | 0.003   | 3                     | 0                                   |                               |
| chr8:20,100,000-20,150,000    | p21.3             | CN Gain  | 50000                     | 67                  | 19                   | 47         | 0.003   | 2                     | 0                                   |                               |
| chr8:28,750,000-31,050,000    | p21.1 - p12       | CN Gain  | 2300000                   | 67                  | 19                   | 47         | 0.003   | 22                    | 2                                   | LEPROT1, WRN                  |
| chr11:6,200,000-6,250,000     | p15.4             | CN Loss  | 50000                     | 47                  | 6                    | 40         | 0.003   | 3                     | 0                                   |                               |
| chr13:20,100,000-20,150,000   | q12.11            | CN Loss  | 50000                     | 47                  | 6                    | 40         | 0.003   | 1                     | 0                                   |                               |
| chr4:104,100,000-104,750,000  | q24               | CN Loss  | 650000                    | 47                  | 6                    | 40         | 0.003   | 3                     | 0                                   |                               |
| chr4:160,300,000-161,600,000  | q32.1             | CN Loss  | 1300000                   | 47                  | 6                    | 40         | 0.003   | 1                     | 0                                   |                               |
| chr4:163,325,000-164,000,000  | q32.2             | CN Loss  | 675000                    | 47                  | 6                    | 40         | 0.003   | 0                     | 0                                   |                               |
| chr4:172,850,000-175,150,000  | q34.1             | CN Loss  | 2300000                   | 47                  | 6                    | 40         | 0.003   | 12                    | 0                                   |                               |
| chr4:179,850,000-180,250,000  | q34.3             | CN Loss  | 400000                    | 47                  | 6                    | 40         | 0.003   | 0                     | 0                                   |                               |
| chr4:189,200,000-191,154,276  | q35.2             | CN Loss  | 1954276                   | 47                  | 6                    | 40         | 0.003   | 9                     | 1                                   | DUX4L1                        |
| chr4:44,450,000-45,200,000    | p13 - p12         | CN Loss  | 750000                    | 47                  | 6                    | 40         | 0.003   | 4                     | 0                                   |                               |
| chr13:29,400,000-30,050,000   | q12.3             | CN Loss  | 650000                    | 40                  | 3                    | 37         | 0.003   | 1                     | 0                                   |                               |
| chr13:31,800,000-32,500,000   | q12.3 - q13.1     | CN Loss  | 700000                    | 40                  | 3                    | 37         | 0.003   | 3                     | 0                                   |                               |
| chr13:34,950,000-35,375,000   | q13.2             | CN Loss  | 425000                    | 40                  | 3                    | 37         | 0.003   | 2                     | 0                                   |                               |
| chr13:36,550,000-38,650,000   | q13.3             | CN Loss  | 2100000                   | 40                  | 3                    | 37         | 0.003   | 19                    | 0                                   |                               |
| chr13:55,450,000-55,500,000   | q21.1             | CN Loss  | 50000                     | 40                  | 3                    | 37         | 0.003   | 0                     | 0                                   |                               |
| chr13:125,450,000-125,500,000 | q21.2             | CN Gain  | 50000                     | 40                  | 3                    | 37         | 0.003   | 1                     | 0                                   |                               |
| chr3:2,050,000-2,250,000      | p26.3             | CN Gain  | 200000                    | 40                  | 3                    | 37         | 0.003   | 2                     | 0                                   |                               |
| chr4:103,150,000-103,950,000  | q24               | CN Loss  | 800000                    | 40                  | 3                    | 37         | 0.003   | 10                    | 0                                   |                               |
| chr4:113,450,000-114,900,000  | q25 - q26         | CN Loss  | 1450000                   | 40                  | 3                    | 37         | 0.003   | 14                    | 0                                   |                               |
| chr4:123,250,000-123,450,000  | q27               | CN Loss  | 200000                    | 40                  | 3                    | 37         | 0.003   | 3                     | 1                                   | IL2                           |
| chr4:156,050,000-156,250,000  | q32.1             | CN Loss  | 200000                    | 40                  | 3                    | 37         | 0.003   | 1                     | 0                                   |                               |
| chr4:159,300,000-159,750,000  | q32.1             | CN Loss  | 450000                    | 40                  | 3                    | 37         | 0.003   | 5                     | 0                                   |                               |
| chr4:162,800,000-163,100,000  | q32.2             | CN Loss  | 300000                    | 40                  | 3                    | 37         | 0.003   | 2                     | 0                                   |                               |
| chr4:180,250,000-180,350,000  | q34.3             | CN Loss  | 100000                    | 40                  | 3                    | 37         | 0.003   | 0                     | 0                                   |                               |
| chr4:180,850,000-181,750,000  | q34.3             | CN Loss  | 900000                    | 40                  | 3                    | 37         | 0.003   | 0                     | 0                                   |                               |
| chr4:55,850,000-56,150,000    | q12               | CN Loss  | 300000                    | 40                  | 3                    | 37         | 0.003   | 1                     | 1                                   | KDR                           |
| chr9:107,350,000-107,450,000  | q31.1             | CN Loss  | 100000                    | 40                  | 3                    | 37         | 0.003   | 3                     | 0                                   |                               |
| chr8:142,400,000-142,450,000  | q24.3             | CN Gain  | 50000                     | 73                  | 26                   | 48         | 0.004   | 2                     | 0                                   |                               |
| chr8:99,950,000-100,650,000   | q22.2             | CN Gain  | 700000                    | 73                  | 26                   | 48         | 0.004   | 5                     | 0                                   |                               |
| chr8:111,150,000-111,450,000  | q23.2             | CN Gain  | 300000                    | 87                  | 39                   | 48         | 0.004   | 0                     | 0                                   |                               |
| chr8:111,900,000-111,950,000  | q23.2             | CN Gain  | 50000                     | 87                  | 39                   | 48         | 0.004   | 1                     | 0                                   |                               |
| chr8:120,750,000-122,200,000  | q24.12            | CN Gain  | 1450000                   | 87                  | 39                   | 48         | 0.004   | 8                     | 0                                   |                               |
| chr8:122,600,000-123,200,000  | q24.13            | CN Gain  | 600000                    | 87                  | 39                   | 48         | 0.004   | 2                     | 0                                   |                               |
| chr1:185,100,000-186,100,000  | q25.3 - q31.1     | CN Gain  | 1000000                   | 80                  | 32                   | 48         | 0.004   | 6                     | 0                                   |                               |
| chr1:228,750,000-233,050,000  | q42.13 - q42.2    | CN Gain  | 4300000                   | 80                  | 32                   | 48         | 0.004   | 173                   | 0                                   |                               |
| chr8:105,850,000-107,150,000  | q22.3 - q23.1     | CN Gain  | 1300000                   | 80                  | 32                   | 48         | 0.004   | 2                     | 0                                   |                               |
| chr8:119,050,000-119,750,000  | q24.11 - q24.12   | CN Gain  | 700000                    | 80                  | 32                   | 48         | 0.004   | 3                     | 1                                   | EXT1                          |
| chr8:112,450,000-112,500,000  | q23.3             | CN Gain  | 50000                     | 87                  | 42                   | 45         | 0.005   | 1                     | 0                                   |                               |
| chr8:122,200,000-122,600,000  | q24.12 - q24.13   | CN Gain  | 400000                    | 87                  | 42                   | 45         | 0.005   | 0                     | 0                                   |                               |
| chr8:16,600,000-16,700,000    | p22               | CN Gain  | 100000                    | 60                  | 16                   | 44         | 0.005   | 0                     | 0                                   |                               |
| chr8:28,050,000-28,150,000    | p21.1             | CN Gain  | 100000                    | 60                  | 16                   | 44         | 0.005   | 0                     | 0                                   |                               |
| chr8:39,350,000-39,400,000    | p11.22            | CN Gain  | 50000                     | 60                  | 16                   | 44         | 0.005   | 1                     | 0                                   |                               |
| chr8:16,700,000-16,750,000    | p22               | CN Gain  | 50000                     | 67                  | 23                   | 44         | 0.008   | 0                     | 0                                   |                               |
| chr8:18,850,000-20,100,000    | p22 - p21.3       | CN Gain  | 1250000                   | 67                  | 23                   | 44         | 0.008   | 8                     | 0                                   |                               |
| chr11:6,100,000-6,200,000     | p15.4             | CN Loss  | 100000                    | 47                  | 10                   | 37         | 0.008   | 2                     | 0                                   |                               |
| chr22:43,400,000-43,600,000   | q13.2             | CN Loss  | 200000                    | 47                  | 10                   | 37         | 0.008   | 8                     | 0                                   |                               |
| chr4:164,000,000-164,200,000  | q32.2             | CN Loss  | 200000                    | 47                  | 10                   | 37         | 0.008   | 2                     | 0                                   |                               |
| chr4:171,000,000-172,850,000  | q33 - q34.1       | CN Loss  | 1850000                   | 47                  | 10                   | 37         | 0.008   | 8                     | 0                                   |                               |
| chr4:178,300,000-179,850,000  | q34.3             | CN Loss  | 1550000                   | 47                  | 10                   | 37         | 0.008   | 3                     | 0                                   |                               |
| chr8:24,250,000-24,350,000    | p21.1             | CN Gain  | 100000                    | 47                  | 10                   | 37         | 0.008   | 4                     | 0                                   |                               |
| chr8:33,500,000-34,000,000    | p12               | CN Gain  | 500000                    | 47                  | 10                   | 37         | 0.008   | 0                     | 0                                   |                               |
| chr9:105,850,000-106,700,000  | q31.1             | CN Loss  | 850000                    | 47                  | 10                   | 37         | 0.008   | 1                     | 0                                   |                               |
| chr9:139,100,000-139,250,000  | q34.3             | CN Loss  | 150000                    | 47                  | 10                   | 37         | 0.008   | 3                     | 0                                   |                               |
| chrX:139,800,000-139,950,000  | q27.1             | CN Loss  | 150000                    | 47                  | 10                   | 37         | 0.008   | 2                     | 0                                   |                               |
| chrX:7,350,000-7,650,000      | p22.31            | CN Loss  | 300000                    | 47                  | 10                   | 37         | 0.008   | 0                     | 0                                   |                               |
| chr1:60,000,000-60,550,000    | p32.1             | CN Gain  | 550000                    | 27                  | 0                    | 27         | 0.008   | 6                     | 0                                   |                               |
| chr10:11,050,000-13,150,000   | p14 - p13         | CN Gain  | 2100000                   | 27                  | 0                    | 27         | 0.008   | 20                    | 0                                   |                               |
| chr10:15,500,000-15,550,000   | p13               | CN Gain  | 50000                     | 27                  | 0                    | 27         | 0.008   | 0                     | 0                                   |                               |
| chr10:18,700,000-19,300,000   | p12.31            | CN Gain  | 600000                    | 27                  | 0                    | 27         | 0.008   | 3                     | 0                                   |                               |
| chr10:7,950,000-8,750,000     | p14               | CN Gain  | 800000                    | 27                  | 0                    | 27         | 0.008   | 5                     | 1                                   | GATA3                         |
| chr11:67,800,000-68,750,000   | q13.2 - q13.3     | CN Gain  | 950000                    | 27                  | 0                    | 27         | 0.008   | 16                    | 0                                   |                               |
| chr12:104,100,000-104,150,000 | q23.3             | CN Loss  | 50000                     | 27                  | 0                    | 27         | 0.008   | 1                     | 0                                   |                               |
| chr13:114,500,000-115,169,878 | q34               | CN Loss  | 669878                    | 27                  | 0                    | 27         | 0.008   | 14                    | 0                                   |                               |
| chr13:64,900,000-67,500,000   | q21.31 - q21.32   | CN Loss  | 2600000                   | 27                  | 0                    | 27         | 0.008   | 5                     | 0                                   |                               |

|                               |                 |         |          |    |    |    |       |     |   |                    |
|-------------------------------|-----------------|---------|----------|----|----|----|-------|-----|---|--------------------|
| chr13:70,300,000-74,800,000   | q21.33 - q22.1  | CN Loss | 4500000  | 27 | 0  | 27 | 0.008 | 11  | 0 |                    |
| chr13:85,950,000-89,150,000   | q31.1 - q31.2   | CN Loss | 3200000  | 27 | 0  | 27 | 0.008 | 8   | 0 |                    |
| chr16:18,150,000-18,475,000   | p12.3           | CN Loss | 325000   | 27 | 0  | 27 | 0.008 | 12  | 0 |                    |
| chr16:7,150,000-7,650,000     | p13.3           | CN Loss | 500000   | 27 | 0  | 27 | 0.008 | 1   | 0 |                    |
| chr17:12,850,000-13,200,000   | p12             | CN Loss | 350000   | 27 | 0  | 27 | 0.008 | 2   | 0 |                    |
| chr17:42,300,000-45,550,000   | q21.31 - q21.32 | CN Gain | 3250000  | 27 | 0  | 27 | 0.008 | 77  | 0 |                    |
| chr17:49,450,000-49,550,000   | q21.33          | CN Gain | 100000   | 27 | 0  | 27 | 0.008 | 1   | 0 |                    |
| chr17:54,650,000-56,650,000   | q22             | CN Gain | 2000000  | 27 | 0  | 27 | 0.008 | 38  | 2 | MSI2, RNF43        |
| chr2:50,350,000-50,400,000    | p16.3           | CN Gain | 50000    | 27 | 0  | 27 | 0.008 | 1   | 0 |                    |
| chr3:76,250,000-76,550,000    | p12.3           | CN Loss | 300000   | 27 | 0  | 27 | 0.008 | 0   | 1 | ROBO2              |
| chr4:119,150,000-120,450,000  | q26             | CN Loss | 1300000  | 27 | 0  | 27 | 0.008 | 19  | 0 |                    |
| chr4:125,200,000-125,500,000  | q28.1           | CN Gain | 300000   | 27 | 0  | 27 | 0.008 | 1   | 0 |                    |
| chr4:143,850,000-144,700,000  | q31.21          | CN Gain | 850000   | 27 | 0  | 27 | 0.008 | 8   | 0 |                    |
| chr4:94,800,000-95,050,000    | q22.2           | CN Loss | 250000   | 27 | 0  | 27 | 0.008 | 1   | 0 |                    |
| chr6:13,000,000-24,250,000    | p24.1 - p22.3   | CN Gain | 11250000 | 27 | 0  | 27 | 0.008 | 51  | 1 | DEK                |
| chr6:31,425,000-35,750,000    | p21.33 - p21.31 | CN Gain | 4325000  | 27 | 0  | 27 | 0.008 | 190 | 3 | DAXX, HMGA1, FANCE |
| chr6:750,000-800,000          | p25.3           | CN Gain | 50000    | 27 | 0  | 27 | 0.008 | 0   | 0 |                    |
| chr6:76,000,000-76,650,000    | q14.1           | CN Gain | 650000   | 27 | 0  | 27 | 0.008 | 7   | 0 |                    |
| chr22:35,400,000-35,500,000   | q12.3           | CN Loss | 100000   | 60 | 19 | 41 | 0.009 | 1   | 1 | ISX                |
| chr8:143,050,000-143,150,000  | q24.3           | CN Gain | 100000   | 60 | 19 | 41 | 0.009 | 1   | 0 |                    |
| chr8:143,450,000-143,550,000  | q24.3           | CN Gain | 100000   | 60 | 19 | 41 | 0.009 | 2   | 0 |                    |
| chr8:20,150,000-20,200,000    | p21.3           | CN Gain | 50000    | 60 | 19 | 41 | 0.009 | 1   | 0 |                    |
| chr8:28,150,000-28,750,000    | p21.1           | CN Gain | 600000   | 60 | 19 | 41 | 0.009 | 9   | 0 |                    |
| chr8:37,450,000-37,600,000    | p11.23          | CN Gain | 150000   | 60 | 19 | 41 | 0.009 | 4   | 0 |                    |
| chr8:14,750,000-16,150,000    | p22             | CN Gain | 1400000  | 53 | 13 | 40 | 0.009 | 3   | 0 |                    |
| chr8:141,100,000-141,400,000  | q24.3           | CN Gain | 300000   | 53 | 13 | 40 | 0.009 | 2   | 0 |                    |
| chr8:20,250,000-20,300,000    | p21.3           | CN Gain | 50000    | 53 | 13 | 40 | 0.009 | 0   | 0 |                    |
| chr8:27,400,000-27,500,000    | p21.1           | CN Gain | 100000   | 53 | 13 | 40 | 0.009 | 4   | 0 |                    |
| chr9:103,750,000-104,400,000  | q31.1           | CN Loss | 650000   | 53 | 13 | 40 | 0.009 | 10  | 0 |                    |
| chr10:59,850,000-60,550,000   | q21.1           | CN Gain | 700000   | 40 | 6  | 34 | 0.010 | 7   | 0 |                    |
| chr10:73,550,000-75,600,000   | q22.1 - q22.2   | CN Gain | 2050000  | 40 | 6  | 34 | 0.010 | 41  | 0 |                    |
| chr11:6,250,000-7,550,000     | p15.4           | CN Loss | 1300000  | 40 | 6  | 34 | 0.010 | 35  | 0 |                    |
| chr12:103,450,000-103,500,000 | q23.2           | CN Loss | 50000    | 40 | 6  | 34 | 0.010 | 0   | 0 |                    |
| chr13:20,150,000-20,200,000   | q12.11          | CN Loss | 50000    | 40 | 6  | 34 | 0.010 | 1   | 0 |                    |
| chr13:55,400,000-55,450,000   | q21.1           | CN Loss | 50000    | 40 | 6  | 34 | 0.010 | 0   | 0 |                    |
| chr14:25,100,000-26,050,000   | q12             | CN Loss | 950000   | 40 | 6  | 34 | 0.010 | 2   | 0 |                    |
| chr14:66,200,000-66,850,000   | q23.3           | CN Loss | 650000   | 40 | 6  | 34 | 0.010 | 1   | 0 |                    |
| chr14:71,950,000-73,350,000   | q24.2           | CN Loss | 1400000  | 40 | 6  | 34 | 0.010 | 5   | 0 |                    |
| chr14:79,400,000-79,700,000   | q31.1           | CN Loss | 300000   | 40 | 6  | 34 | 0.010 | 2   | 0 |                    |
| chr16:73,500,000-74,200,000   | q22.3 - q23.1   | CN Loss | 700000   | 40 | 6  | 34 | 0.010 | 0   | 0 |                    |
| chr16:81,925,000-82,200,000   | q23.3           | CN Loss | 275000   | 40 | 6  | 34 | 0.010 | 4   | 0 |                    |
| chr17:73,950,000-74,800,000   | q25.1 - q25.2   | CN Gain | 850000   | 40 | 6  | 34 | 0.010 | 37  | 1 | SRSF2              |
| chr19:56,200,000-56,300,000   | q13.42 - q13.43 | CN Loss | 100000   | 40 | 6  | 34 | 0.010 | 5   | 0 |                    |
| chr3:124,400,000-124,450,000  | q21.2           | CN Gain | 50000    | 40 | 6  | 34 | 0.010 | 2   | 0 |                    |
| chr4:100,950,000-101,600,000  | q23 - q24       | CN Loss | 650000   | 40 | 6  | 34 | 0.010 | 6   | 0 |                    |
| chr4:103,950,000-104,100,000  | q24             | CN Loss | 150000   | 40 | 6  | 34 | 0.010 | 3   | 0 |                    |
| chr4:104,750,000-109,350,000  | q24 - q25       | CN Loss | 4600000  | 40 | 6  | 34 | 0.010 | 24  | 2 | TET2, LEF1         |
| chr4:110,650,000-113,450,000  | q25             | CN Loss | 2800000  | 40 | 6  | 34 | 0.010 | 17  | 0 |                    |
| chr4:114,900,000-115,050,000  | q26             | CN Loss | 150000   | 40 | 6  | 34 | 0.010 | 1   | 0 |                    |
| chr4:122,250,000-123,250,000  | q27             | CN Loss | 1000000  | 40 | 6  | 34 | 0.010 | 9   | 0 |                    |
| chr4:130,350,000-130,900,000  | q28.2           | CN Loss | 550000   | 40 | 6  | 34 | 0.010 | 2   | 0 |                    |
| chr4:131,200,000-132,450,000  | q28.3           | CN Loss | 1250000  | 40 | 6  | 34 | 0.010 | 1   | 0 |                    |
| chr4:14,450,000-14,800,000    | p15.33          | CN Loss | 350000   | 40 | 6  | 34 | 0.010 | 1   | 0 |                    |
| chr4:147,250,000-147,350,000  | q31.22          | CN Loss | 100000   | 40 | 6  | 34 | 0.010 | 2   | 0 |                    |
| chr4:149,500,000-151,900,000  | q31.23 - q31.3  | CN Loss | 2400000  | 40 | 6  | 34 | 0.010 | 7   | 0 |                    |
| chr4:153,150,000-156,050,000  | q31.3 - q32.1   | CN Loss | 2900000  | 40 | 6  | 34 | 0.010 | 25  | 1 | FBXW7              |
| chr4:159,750,000-160,300,000  | q32.1           | CN Loss | 550000   | 40 | 6  | 34 | 0.010 | 5   | 0 |                    |
| chr4:163,100,000-163,325,000  | q32.2           | CN Loss | 225000   | 40 | 6  | 34 | 0.010 | 0   | 0 |                    |
| chr4:175,150,000-178,300,000  | q34.1 - q34.3   | CN Loss | 3150000  | 40 | 6  | 34 | 0.010 | 16  | 0 |                    |
| chr4:181,750,000-182,300,000  | q34.3           | CN Loss | 550000   | 40 | 6  | 34 | 0.010 | 2   | 0 |                    |
| chr4:186,050,000-189,200,000  | q35.1 - q35.2   | CN Loss | 3150000  | 40 | 6  | 34 | 0.010 | 27  | 1 | FAT1               |
| chr4:36,400,000-36,550,000    | p14             | CN Loss | 150000   | 40 | 6  | 34 | 0.010 | 2   | 0 |                    |
| chr4:43,800,000-44,450,000    | p13             | CN Loss | 650000   | 40 | 6  | 34 | 0.010 | 2   | 0 |                    |
| chr4:45,200,000-48,100,000    | p12             | CN Loss | 2900000  | 40 | 6  | 34 | 0.010 | 15  | 0 |                    |
| chr4:54,750,000-55,850,000    | q12             | CN Loss | 1100000  | 40 | 6  | 34 | 0.010 | 7   | 3 | CHIC2, PDGFRA, KIT |
| chr4:67,150,000-67,300,000    | q13.2           | CN Loss | 150000   | 40 | 6  | 34 | 0.010 | 0   | 0 |                    |
| chr4:75,950,000-76,400,000    | q13.3 - q21.1   | CN Loss | 450000   | 40 | 6  | 34 | 0.010 | 3   | 0 |                    |
| chr4:79,850,000-83,200,000    | q21.21 - q21.22 | CN Loss | 3350000  | 40 | 6  | 34 | 0.010 | 14  | 0 |                    |
| chr5:19,900,000-23,350,000    | p14.3 - p14.2   | CN Gain | 3450000  | 40 | 6  | 34 | 0.010 | 9   | 0 |                    |
| chr5:27,500,000-30,550,000    | p14.1 - p13.3   | CN Gain | 3050000  | 40 | 6  | 34 | 0.010 | 6   | 0 |                    |
| chr5:53,100,000-53,350,000    | q11.2           | CN Gain | 250000   | 40 | 6  | 34 | 0.010 | 3   | 0 |                    |
| chr8:34,800,000-35,000,000    | p12             | CN Gain | 200000   | 40 | 6  | 34 | 0.010 | 0   | 0 |                    |
| chr8:36,650,000-36,700,000    | p11.23          | CN Gain | 50000    | 40 | 6  | 34 | 0.010 | 1   | 0 |                    |
| chr9:106,800,000-107,350,000  | q31.1           | CN Loss | 550000   | 40 | 6  | 34 | 0.010 | 7   | 0 |                    |
| chr9:108,400,000-109,350,000  | q31.2           | CN Loss | 950000   | 40 | 6  | 34 | 0.010 | 3   | 1 | TAL2               |
| chrX:31,050,000-32,050,000    | p21.2 - p21.1   | CN Loss | 1000000  | 40 | 6  | 34 | 0.010 | 2   | 0 |                    |
| chrX:4,850,000-5,400,000      | p22.32          | CN Loss | 550000   | 40 | 6  | 34 | 0.010 | 0   | 0 |                    |
| chrX:5,800,000-6,000,000      | p22.32 - p22.31 | CN Loss | 200000   | 40 | 6  | 34 | 0.010 | 1   | 0 |                    |
| chr1:181,100,000-181,250,000  | q25.3           | CN Gain | 150000   | 73 | 29 | 44 | 0.010 | 2   | 0 |                    |
| chr1:182,050,000-182,100,000  | q25.3           | CN Gain | 50000    | 73 | 29 | 44 | 0.010 | 0   | 0 |                    |
| chr8:100,650,000-101,250,000  | q22.2           | CN Gain | 600000   | 73 | 29 | 44 | 0.010 | 7   | 1 | COX6C              |
| chr8:118,750,000-119,000,000  | q24.11          | CN Gain | 250000   | 73 | 29 | 44 | 0.010 | 2   | 1 | EXT1               |
| chr8:126,750,000-132,350,000  | q24.13 - q24.22 | CN Gain | 5600000  | 73 | 29 | 44 | 0.010 | 33  | 1 | MYC                |
| chr8:134,600,000-135,000,000  | q24.22          | CN Gain | 400000   | 73 | 29 | 44 | 0.010 | 3   | 0 |                    |
| chr8:145,000,000-146,364,022  | q24.3           | CN Gain | 1364022  | 73 | 29 | 44 | 0.010 | 66  | 1 | RECQL4             |
| chr8:111,950,000-112,450,000  | q23.2 - q23.3   | CN Gain | 500000   | 87 | 45 | 42 | 0.010 | 3   | 0 |                    |
| chr10:0-1,150,000             | p15.3           | CN Gain | 1150000  | 33 | 3  | 30 | 0.010 | 13  | 1 | LARP4B             |
| chr10:14,850,000-15,450,000   | p13             | CN Gain | 600000   | 33 | 3  | 30 | 0.010 | 14  | 0 |                    |
| chr10:25,200,000-25,300,000   | p12.1           | CN Gain | 100000   | 33 | 3  | 30 | 0.010 | 2   | 0 |                    |
| chr10:28,300,000-29,550,000   | p12.1           | CN Gain | 1250000  | 33 | 3  | 30 | 0.010 | 10  | 0 |                    |
| chr10:3,950,000-7,850,000     | p15.1 - p14     | CN Gain | 3900000  | 33 | 3  | 30 | 0.010 | 47  | 0 |                    |
| chr10:34,000,000-35,800,000   | p11.22 - p11.21 | CN Gain | 1800000  | 33 | 3  | 30 | 0.010 | 7   | 0 |                    |
| chr10:54,450,000-54,950,000   | q21.1           | CN Gain | 500000   | 33 | 3  | 30 | 0.010 | 2   | 0 |                    |
| chr10:55,150,000-57,650,000   | q21.1           | CN Gain | 2500000  | 33 | 3  | 30 | 0.010 | 4   | 0 |                    |
| chr10:58,850,000-59,800,000   | q21.1           | CN Gain | 950000   | 33 | 3  | 30 | 0.010 | 1   | 0 |                    |
| chr10:71,300,000-73,350,000   | q22.1           | CN Gain | 2050000  | 33 | 3  | 30 | 0.010 | 24  | 1 | PRF1               |
| chr10:77,450,000-77,850,000   | q22.2 - q22.3   | CN Gain | 400000   | 33 | 3  | 30 | 0.010 | 2   | 0 |                    |
| chr13:107,600,000-109,400,000 | q33.3           | CN Loss | 1800000  | 33 | 3  | 30 | 0.010 | 8   | 0 |                    |
| chr13:113,300,000-115,169,878 | q34             | CN Gain | 1869878  | 33 | 3  | 30 | 0.010 | 37  | 0 |                    |
| chr13:20,250,000-23,100,000   | q12.11          | CN Loss | 2850000  | 33 | 3  | 30 | 0.010 | 28  | 2 | ZMYM2, LATS2       |
| chr13:28,950,000-29,400,000   | q12.3           | CN Loss | 450000   | 33 | 3  | 30 | 0.010 | 4   | 0 |                    |
| chr13:30,050,000-31,800,000   | q12.3           | CN Loss | 1750000  | 33 | 3  | 30 | 0.010 | 24  | 0 |                    |
| chr13:32,500,000-34,950,000   | q13.1 - q13.2   | CN Loss | 2450000  | 33 | 3  | 30 | 0.010 | 17  | 1 | BRCA2              |
| chr13:38,650,000-40,300,000   | q13.3 - q14.11  | CN Loss | 1650000  | 33 | 3  | 30 | 0.010 | 12  | 2 | LHFP16, LHFP       |
| chr13:42,600,000-44,400,000   | q14.11          | CN Loss | 1800000  | 33 | 3  | 30 | 0.010 | 12  | 0 |                    |
| chr13:45,150,000-48,450,000   | q14.11 - q14.2  | CN Loss | 3300000  | 33 | 3  | 30 | 0.010 | 33  | 1 | LCP1               |
| chr13:50,150,000-53,450,000   | q14.2 - q14.3   | CN Loss | 3300000  | 33 | 3  | 30 | 0.010 | 48  | 0 |                    |
| chr13:55,500,000-55,750,000   | q21.1           | CN Loss | 250000   | 33 | 3  | 30 | 0.010 | 1   | 0 |                    |
| chr13:57,700,000-59,150,000   | q21.1           | CN Loss | 1450000  | 33 | 3  | 30 | 0.010 | 28  | 0 |                    |

|                              |                 |         |          |    |    |    |       |     |   |                                  |
|------------------------------|-----------------|---------|----------|----|----|----|-------|-----|---|----------------------------------|
| chr13:67,500,000-68,450,000  | q21.32          | CN Loss | 950000   | 33 | 3  | 30 | 0.010 | 4   | 0 |                                  |
| chr13:69,300,000-69,650,000  | q21.33          | CN Loss | 350000   | 33 | 3  | 30 | 0.010 | 1   | 0 |                                  |
| chr13:71,100,000-72,800,000  | q21.33          | CN Gain | 1700000  | 33 | 3  | 30 | 0.010 | 2   | 0 |                                  |
| chr13:75,350,000-75,700,000  | q22.1 - q22.2   | CN Loss | 350000   | 33 | 3  | 30 | 0.010 | 0   | 0 |                                  |
| chr13:78,950,000-79,400,000  | q22.2 - q31.1   | CN Loss | 450000   | 33 | 3  | 30 | 0.010 | 5   | 0 |                                  |
| chr13:81,800,000-82,300,000  | q31.1           | CN Gain | 500000   | 33 | 3  | 30 | 0.010 | 1   | 0 |                                  |
| chr13:83,700,000-84,900,000  | q31.1           | CN Loss | 1200000  | 33 | 3  | 30 | 0.010 | 2   | 0 |                                  |
| chr13:87,950,000-89,150,000  | q31.2           | CN Gain | 1200000  | 33 | 3  | 30 | 0.010 | 5   | 0 |                                  |
| chr15:59,150,000-60,000,000  | q22.1 - q22.2   | CN Loss | 850000   | 33 | 3  | 30 | 0.010 | 11  | 0 |                                  |
| chr17:11,800,000-12,700,000  | p12             | CN Loss | 900000   | 33 | 3  | 30 | 0.010 | 9   | 1 | MAP2K4                           |
| chr17:41,650,000-42,000,000  | q21.31          | CN Gain | 350000   | 33 | 3  | 30 | 0.010 | 8   | 0 |                                  |
| chr17:47,350,000-47,850,000  | q21.32 - q21.33 | CN Gain | 500000   | 33 | 3  | 30 | 0.010 | 12  | 1 | SPOP                             |
| chr17:49,350,000-49,450,000  | q21.33          | CN Gain | 100000   | 33 | 3  | 30 | 0.010 | 3   | 0 |                                  |
| chr17:56,950,000-57,050,000  | q22             | CN Gain | 100000   | 33 | 3  | 30 | 0.010 | 1   | 0 |                                  |
| chr17:75,450,000-77,050,000  | q25.3           | CN Gain | 1600000  | 33 | 3  | 30 | 0.010 | 31  | 2 | SEPT9, CANT1                     |
| chr17:77,575,000-81,195,210  | q25.3           | CN Gain | 3620210  | 33 | 3  | 30 | 0.010 | 108 | 2 | RNF213, ASPSCR1                  |
| chr19:35,000,000-35,400,000  | q13.11          | CN Loss | 400000   | 33 | 3  | 30 | 0.010 | 11  | 0 |                                  |
| chr2:163,900,000-164,100,000 | q24.3           | CN Gain | 200000   | 33 | 3  | 30 | 0.010 | 0   | 0 |                                  |
| chr3:101,800,000-105,250,000 | q12.3 - q13.11  | CN Gain | 3450000  | 33 | 3  | 30 | 0.010 | 4   | 0 |                                  |
| chr3:11,150,000-13,450,000   | p25.3 - p25.1   | CN Gain | 2300000  | 33 | 3  | 30 | 0.010 | 18  | 2 | PPARG, RAF1                      |
| chr3:122,000,000-123,950,000 | q21.1 - q21.2   | CN Gain | 1950000  | 33 | 3  | 30 | 0.010 | 27  | 0 |                                  |
| chr3:125,500,000-125,600,000 | q21.2           | CN Gain | 100000   | 33 | 3  | 30 | 0.010 | 3   | 0 |                                  |
| chr3:2,250,000-3,350,000     | p26.3 - p26.2   | CN Gain | 1100000  | 33 | 3  | 30 | 0.010 | 5   | 0 |                                  |
| chr3:21,200,000-23,300,000   | p24.3           | CN Gain | 2100000  | 33 | 3  | 30 | 0.010 | 6   | 0 |                                  |
| chr3:24,950,000-25,850,000   | p24.2           | CN Gain | 900000   | 33 | 3  | 30 | 0.010 | 6   | 0 |                                  |
| chr3:8,450,000-9,800,000     | p26.1 - p25.3   | CN Gain | 1350000  | 33 | 3  | 30 | 0.010 | 20  | 1 | SRGAP3                           |
| chr4:101,850,000-103,150,000 | q24             | CN Loss | 1300000  | 33 | 3  | 30 | 0.010 | 5   | 0 |                                  |
| chr4:116,300,000-117,350,000 | q26             | CN Loss | 1050000  | 33 | 3  | 30 | 0.010 | 1   | 0 |                                  |
| chr4:121,050,000-121,100,000 | q27             | CN Loss | 50000    | 33 | 3  | 30 | 0.010 | 0   | 0 |                                  |
| chr4:123,450,000-123,650,000 | q27             | CN Loss | 200000   | 33 | 3  | 30 | 0.010 | 2   | 0 |                                  |
| chr4:124,300,000-125,100,000 | q28.1           | CN Gain | 800000   | 33 | 3  | 30 | 0.010 | 2   | 0 |                                  |
| chr4:56,150,000-56,450,000   | q12             | CN Loss | 300000   | 33 | 3  | 30 | 0.010 | 5   | 0 |                                  |
| chr4:71,450,000-72,250,000   | q13.3           | CN Loss | 800000   | 33 | 3  | 30 | 0.010 | 9   | 0 |                                  |
| chr9:107,450,000-107,500,000 | q31.1           | CN Loss | 50000    | 33 | 3  | 30 | 0.010 | 1   | 0 |                                  |
| chr9:108,250,000-108,350,000 | q31.2           | CN Loss | 100000   | 33 | 3  | 30 | 0.010 | 3   | 0 |                                  |
| chr9:123,200,000-124,450,000 | q33.2           | CN Loss | 1250000  | 33 | 3  | 30 | 0.010 | 17  | 1 | CNTRL                            |
| chr8:108,450,000-110,400,000 | q23.1           | CN Gain | 1950000  | 80 | 35 | 45 | 0.011 | 9   | 2 | RSPO2, EIF3E                     |
| chr8:117,500,000-118,650,000 | q23.3 - q24.11  | CN Gain | 1150000  | 67 | 26 | 41 | 0.011 | 9   | 1 | RAD21                            |
| chr8:16,750,000-16,850,000   | p22             | CN Gain | 100000   | 67 | 26 | 41 | 0.011 | 1   | 0 |                                  |
| chr8:18,500,000-18,850,000   | p22             | CN Gain | 350000   | 67 | 26 | 41 | 0.011 | 1   | 0 |                                  |
| chr8:97,175,000-99,950,000   | q22.1 - q22.2   | CN Gain | 2775000  | 67 | 26 | 41 | 0.011 | 21  | 0 |                                  |
| chr1:156,200,000-156,550,000 | q22 - q23.1     | CN Gain | 350000   | 80 | 39 | 41 | 0.012 | 15  | 0 |                                  |
| chr8:111,450,000-111,900,000 | q23.2           | CN Gain | 450000   | 80 | 39 | 41 | 0.012 | 0   | 0 |                                  |
| chr1:167,200,000-175,000,000 | q24.2 - q25.1   | CN Gain | 7800000  | 73 | 32 | 41 | 0.012 | 101 | 1 | PRRX1                            |
| chr1:178,000,000-181,100,000 | q25.2 - q25.3   | CN Gain | 3100000  | 73 | 32 | 41 | 0.012 | 33  | 1 | ABL2                             |
| chr1:182,100,000-185,100,000 | q25.3           | CN Gain | 3000000  | 73 | 32 | 41 | 0.012 | 32  | 0 |                                  |
| chr1:186,100,000-187,600,000 | q31.1           | CN Gain | 1500000  | 73 | 32 | 41 | 0.012 | 11  | 1 | TPR                              |
| chr1:196,200,000-206,700,000 | q31.3 - q32.1   | CN Gain | 10500000 | 73 | 32 | 41 | 0.012 | 146 | 5 | PTPRC, ELF3, MDM4, ELK4, SLC45A3 |
| chr1:211,400,000-213,300,000 | q32.2 - q32.3   | CN Gain | 1900000  | 73 | 32 | 41 | 0.012 | 31  | 0 |                                  |
| chr1:222,750,000-223,775,000 | q41             | CN Gain | 1025000  | 73 | 32 | 41 | 0.012 | 11  | 0 |                                  |
| chr1:224,850,000-228,750,000 | q42.12 - q42.13 | CN Gain | 3900000  | 73 | 32 | 41 | 0.012 | 87  | 1 | H3F3A                            |
| chr1:233,050,000-234,450,000 | q42.2           | CN Gain | 1400000  | 73 | 32 | 41 | 0.012 | 7   | 0 |                                  |
| chr11:50,000,000-50,150,000  | p11.12          | CN Loss | 150000   | 73 | 32 | 41 | 0.012 | 1   | 0 |                                  |
| chr8:101,250,000-103,900,000 | q22.2 - q22.3   | CN Gain | 2650000  | 73 | 32 | 41 | 0.012 | 25  | 2 | PABPC1, UBR5                     |
| chr8:105,800,000-105,850,000 | q22.3           | CN Gain | 50000    | 73 | 32 | 41 | 0.012 | 0   | 0 |                                  |
| chr8:119,000,000-119,050,000 | q24.11          | CN Gain | 50000    | 73 | 32 | 41 | 0.012 | 1   | 1 | EXT1                             |
| chr8:132,350,000-134,600,000 | q24.22          | CN Gain | 2250000  | 73 | 32 | 41 | 0.012 | 15  | 1 | NDRG1                            |
| chr13:19,900,000-20,000,000  | q12.11          | CN Loss | 100000   | 53 | 16 | 37 | 0.014 | 3   | 0 |                                  |
| chr22:43,800,000-44,150,000  | q13.2           | CN Loss | 350000   | 53 | 16 | 37 | 0.014 | 4   | 0 |                                  |
| chr22:47,150,000-47,200,000  | q13.31          | CN Loss | 50000    | 53 | 16 | 37 | 0.014 | 1   | 0 |                                  |
| chr22:50,450,000-51,304,566  | q13.33          | CN Loss | 854566   | 53 | 16 | 37 | 0.014 | 36  | 0 |                                  |
| chr3:0-950,000               | p26.3           | CN Gain | 950000   | 53 | 16 | 37 | 0.014 | 5   | 0 |                                  |
| chr6:163,050,000-163,150,000 | q26             | CN Loss | 100000   | 53 | 16 | 37 | 0.014 | 2   | 0 |                                  |
| chr8:27,500,000-28,050,000   | p21.1           | CN Gain | 550000   | 53 | 16 | 37 | 0.014 | 10  | 0 |                                  |
| chr8:31,050,000-31,200,000   | p12             | CN Gain | 150000   | 53 | 16 | 37 | 0.014 | 0   | 0 |                                  |
| chr8:39,250,000-39,350,000   | p11.22          | CN Gain | 100000   | 53 | 16 | 37 | 0.014 | 2   | 0 |                                  |
| chr8:143,550,000-144,100,000 | q24.3           | CN Gain | 550000   | 60 | 23 | 37 | 0.021 | 20  | 0 |                                  |
| chr8:37,600,000-39,200,000   | p11.23 - p11.22 | CN Gain | 1600000  | 60 | 23 | 37 | 0.021 | 28  | 3 | NSD3, WHSC1L1, FGFR1             |
| chr11:5,350,000-5,400,000    | p15.4           | CN Loss | 50000    | 47 | 13 | 34 | 0.024 | 2   | 0 |                                  |
| chr11:5,600,000-6,100,000    | p15.4           | CN Loss | 500000   | 47 | 13 | 34 | 0.024 | 20  | 0 |                                  |
| chr14:78,650,000-78,750,000  | q24.3           | CN Loss | 100000   | 47 | 13 | 34 | 0.024 | 1   | 0 |                                  |
| chr14:79,000,000-79,300,000  | q24.3 - q31.1   | CN Loss | 300000   | 47 | 13 | 34 | 0.024 | 1   | 0 |                                  |
| chr16:83,000,000-83,050,000  | q23.3           | CN Loss | 50000    | 47 | 13 | 34 | 0.024 | 2   | 0 |                                  |
| chr20:35,850,000-35,900,000  | q11.23          | CN Gain | 50000    | 47 | 13 | 34 | 0.024 | 2   | 0 |                                  |
| chr22:44,700,000-47,000,000  | q13.31          | CN Loss | 2300000  | 47 | 13 | 34 | 0.024 | 42  | 0 |                                  |
| chr3:148,300,000-148,450,000 | q24             | CN Gain | 150000   | 47 | 13 | 34 | 0.024 | 1   | 0 |                                  |
| chr6:163,650,000-163,950,000 | q26             | CN Loss | 300000   | 47 | 13 | 34 | 0.024 | 5   | 1 | QKI                              |
| chr8:14,700,000-14,750,000   | p22             | CN Gain | 50000    | 47 | 13 | 34 | 0.024 | 2   | 0 |                                  |
| chr8:141,000,000-141,100,000 | q24.3           | CN Gain | 100000   | 47 | 13 | 34 | 0.024 | 1   | 0 |                                  |
| chr8:22,600,000-24,250,000   | p21.3 - p21.2   | CN Gain | 1650000  | 47 | 13 | 34 | 0.024 | 22  | 0 |                                  |
| chr8:26,000,000-27,400,000   | p21.2 - p21.1   | CN Gain | 1400000  | 47 | 13 | 34 | 0.024 | 13  | 0 |                                  |
| chr8:33,450,000-33,500,000   | p12             | CN Gain | 50000    | 47 | 13 | 34 | 0.024 | 1   | 0 |                                  |
| chr8:50,200,000-51,150,000   | q11.21          | CN Gain | 950000   | 47 | 13 | 34 | 0.024 | 2   | 0 |                                  |
| chr9:103,400,000-103,750,000 | q31.1           | CN Loss | 350000   | 47 | 13 | 34 | 0.024 | 0   | 0 |                                  |
| chr9:104,400,000-105,850,000 | q31.1           | CN Loss | 1450000  | 47 | 13 | 34 | 0.024 | 3   | 0 |                                  |
| chr9:120,450,000-123,100,000 | q33.1 - q33.2   | CN Loss | 2650000  | 47 | 13 | 34 | 0.024 | 5   | 0 |                                  |
| chr9:138,800,000-139,100,000 | q34.3           | CN Loss | 300000   | 47 | 13 | 34 | 0.024 | 5   | 0 |                                  |
| chrX:127,800,000-128,300,000 | q25             | CN Loss | 500000   | 47 | 13 | 34 | 0.024 | 0   | 0 |                                  |
| chrX:137,950,000-139,800,000 | q26.3 - q27.1   | CN Loss | 1850000  | 47 | 13 | 34 | 0.024 | 11  | 0 |                                  |
| chrX:6,550,000-7,350,000     | p22.31          | CN Loss | 800000   | 47 | 13 | 34 | 0.024 | 3   | 0 |                                  |
| chr1:181,250,000-181,700,000 | q25.3           | CN Gain | 450000   | 67 | 29 | 38 | 0.025 | 1   | 0 |                                  |
| chr1:213,350,000-213,450,000 | q32.3           | CN Gain | 100000   | 67 | 29 | 38 | 0.025 | 1   | 0 |                                  |
| chr1:26,300,000-26,600,000   | p36.11          | CN Loss | 300000   | 67 | 29 | 38 | 0.025 | 12  | 0 |                                  |
| chr1:26,800,000-26,900,000   | p36.11          | CN Loss | 100000   | 67 | 29 | 38 | 0.025 | 3   | 0 |                                  |
| chr1:9,550,000-10,550,000    | p36.22          | CN Loss | 1000000  | 67 | 29 | 38 | 0.025 | 25  | 0 |                                  |
| chr13:19,275,000-19,750,000  | q11 - q12.11    | CN Loss | 475000   | 67 | 29 | 38 | 0.025 | 6   | 0 |                                  |
| chr8:115,400,000-117,500,000 | q23.3           | CN Gain | 2100000  | 67 | 29 | 38 | 0.025 | 2   | 0 |                                  |
| chr8:118,650,000-118,750,000 | q24.11          | CN Gain | 100000   | 67 | 29 | 38 | 0.025 | 0   | 0 |                                  |
| chr8:135,000,000-135,400,000 | q24.22          | CN Gain | 400000   | 67 | 29 | 38 | 0.025 | 0   | 0 |                                  |
| chr8:144,400,000-145,000,000 | q24.3           | CN Gain | 600000   | 67 | 29 | 38 | 0.025 | 32  | 0 |                                  |
| chr8:16,850,000-17,350,000   | p22             | CN Gain | 500000   | 67 | 29 | 38 | 0.025 | 6   | 0 |                                  |
| chr8:18,100,000-18,500,000   | p22             | CN Gain | 400000   | 67 | 29 | 38 | 0.025 | 2   | 0 |                                  |
| chr8:112,500,000-112,550,000 | q23.3           | CN Gain | 50000    | 80 | 42 | 38 | 0.026 | 0   | 0 |                                  |
| chr1:156,800,000-156,950,000 | q23.1           | CN Gain | 150000   | 73 | 35 | 38 | 0.027 | 6   | 1 | NTRK1                            |
| chr1:223,775,000-224,850,000 | q41 - q42.12    | CN Gain | 1075000  | 73 | 35 | 38 | 0.027 | 15  | 0 |                                  |
| chr1:23,400,000-23,650,000   | p36.12          | CN Loss | 250000   | 73 | 35 | 38 | 0.027 | 5   | 0 |                                  |
| chr1:234,450,000-236,150,000 | q42.2 - q42.3   | CN Gain | 1700000  | 73 | 35 | 38 | 0.027 | 23  | 0 |                                  |
| chr11:49,950,000-50,000,000  | p11.12          | CN Loss | 50000    | 73 | 35 | 38 | 0.027 | 1   | 0 |                                  |
| chr8:141,750,000-142,400,000 | q24.3           | CN Gain | 650000   | 73 | 35 | 38 | 0.027 | 6   | 0 |                                  |



|                               |                 |         |         |    |   |    |       |    |   |               |
|-------------------------------|-----------------|---------|---------|----|---|----|-------|----|---|---------------|
| chr10:22,200,000-22,300,000   | p12.31          | CN Gain | 100000  | 33 | 6 | 27 | 0.029 | 1  | 0 |               |
| chr10:24,250,000-25,200,000   | p12.2 - p12.1   | CN Gain | 950000  | 33 | 6 | 27 | 0.029 | 4  | 0 |               |
| chr10:3,000,000-3,950,000     | p15.2 - p15.1   | CN Gain | 950000  | 33 | 6 | 27 | 0.029 | 10 | 1 | KLFB          |
| chr10:59,800,000-59,850,000   | q21.1           | CN Gain | 50000   | 33 | 6 | 27 | 0.029 | 0  | 0 |               |
| chr10:60,550,000-61,550,000   | q21.1 - q21.2   | CN Gain | 1000000 | 33 | 6 | 27 | 0.029 | 8  | 1 | CCDC6         |
| chr10:64,850,000-64,900,000   | q21.3           | CN Gain | 50000   | 33 | 6 | 27 | 0.029 | 1  | 0 |               |
| chr10:73,350,000-73,550,000   | q22.1           | CN Gain | 200000  | 33 | 6 | 27 | 0.029 | 3  | 0 |               |
| chr10:77,200,000-77,450,000   | q22.2           | CN Gain | 250000  | 33 | 6 | 27 | 0.029 | 2  | 0 |               |
| chr10:94,550,000-94,650,000   | q23.33          | CN Gain | 100000  | 33 | 6 | 27 | 0.029 | 1  | 0 |               |
| chr11:20,600,000-20,900,000   | p15.1           | CN Loss | 300000  | 33 | 6 | 27 | 0.029 | 2  | 0 |               |
| chr11:7,550,000-7,950,000     | p15.4           | CN Loss | 400000  | 33 | 6 | 27 | 0.029 | 8  | 0 |               |
| chr12:103,300,000-103,450,000 | q23.2           | CN Loss | 150000  | 33 | 6 | 27 | 0.029 | 2  | 0 |               |
| chr12:104,000,000-104,050,000 | q23.3           | CN Loss | 50000   | 33 | 6 | 27 | 0.029 | 1  | 0 |               |
| chr13:20,200,000-20,250,000   | q12.11          | CN Loss | 50000   | 33 | 6 | 27 | 0.029 | 2  | 0 |               |
| chr13:44,400,000-45,150,000   | q14.11          | CN Loss | 750000  | 33 | 6 | 27 | 0.029 | 11 | 0 |               |
| chr13:53,450,000-54,000,000   | q14.3           | CN Loss | 550000  | 33 | 6 | 27 | 0.029 | 2  | 0 |               |
| chr13:68,450,000-69,300,000   | q21.32 - q21.33 | CN Loss | 850000  | 33 | 6 | 27 | 0.029 | 0  | 0 |               |
| chr13:72,800,000-74,700,000   | q21.33 - q22.1  | CN Gain | 1900000 | 33 | 6 | 27 | 0.029 | 7  | 0 |               |
| chr13:78,500,000-78,950,000   | q22.3           | CN Loss | 450000  | 33 | 6 | 27 | 0.029 | 4  | 0 |               |
| chr13:86,850,000-87,950,000   | q31.1 - q31.2   | CN Gain | 1100000 | 33 | 6 | 27 | 0.029 | 1  | 0 |               |
| chr14:23,800,000-24,450,000   | q11.2           | CN Loss | 650000  | 33 | 6 | 27 | 0.029 | 19 | 0 |               |
| chr14:25,000,000-25,100,000   | q12             | CN Loss | 100000  | 33 | 6 | 27 | 0.029 | 2  | 0 |               |
| chr14:26,050,000-26,600,000   | q12             | CN Loss | 550000  | 33 | 6 | 27 | 0.029 | 0  | 0 |               |
| chr14:28,900,000-29,900,000   | q12             | CN Loss | 1000000 | 33 | 6 | 27 | 0.029 | 4  | 0 |               |
| chr14:36,450,000-37,450,000   | q13.2 - q13.3   | CN Loss | 1000000 | 33 | 6 | 27 | 0.029 | 10 | 1 | NKX2-1        |
| chr14:53,750,000-54,350,000   | q22.1 - q22.2   | CN Loss | 600000  | 33 | 6 | 27 | 0.029 | 0  | 0 |               |
| chr14:55,900,000-58,550,000   | q22.3 - q23.1   | CN Loss | 2650000 | 33 | 6 | 27 | 0.029 | 16 | 1 | KTN1          |
| chr14:59,500,000-60,000,000   | q23.1           | CN Loss | 500000  | 33 | 6 | 27 | 0.029 | 5  | 0 |               |
| chr14:65,400,000-66,200,000   | q23.3           | CN Loss | 800000  | 33 | 6 | 27 | 0.029 | 13 | 1 | MAX           |
| chr14:66,850,000-66,900,000   | q23.3           | CN Loss | 50000   | 33 | 6 | 27 | 0.029 | 0  | 0 |               |
| chr14:69,850,000-70,200,000   | q24.1 - q24.2   | CN Loss | 350000  | 33 | 6 | 27 | 0.029 | 5  | 0 |               |
| chr14:70,600,000-71,950,000   | q24.2           | CN Loss | 1350000 | 33 | 6 | 27 | 0.029 | 17 | 0 |               |
| chr14:79,700,000-80,150,000   | q31.1           | CN Loss | 450000  | 33 | 6 | 27 | 0.029 | 1  | 0 |               |
| chr15:60,000,000-61,100,000   | q22.2           | CN Loss | 1100000 | 33 | 6 | 27 | 0.029 | 6  | 0 |               |
| chr16:73,250,000-73,500,000   | q22.3           | CN Loss | 250000  | 33 | 6 | 27 | 0.029 | 1  | 0 |               |
| chr16:74,200,000-74,250,000   | q23.1           | CN Loss | 50000   | 33 | 6 | 27 | 0.029 | 1  | 0 |               |
| chr16:80,425,000-80,750,000   | q23.2           | CN Loss | 325000  | 33 | 6 | 27 | 0.029 | 4  | 0 |               |
| chr16:81,800,000-81,925,000   | q23.3           | CN Loss | 125000  | 33 | 6 | 27 | 0.029 | 1  | 0 |               |
| chr17:41,350,000-41,650,000   | q21.31          | CN Gain | 300000  | 33 | 6 | 27 | 0.029 | 9  | 1 | ETV4          |
| chr17:47,850,000-47,950,000   | q21.33          | CN Gain | 100000  | 33 | 6 | 27 | 0.029 | 3  | 1 | KAT7          |
| chr17:57,050,000-57,150,000   | q22             | CN Gain | 100000  | 33 | 6 | 27 | 0.029 | 2  | 0 |               |
| chr17:74,800,000-75,450,000   | q25.2 - q25.3   | CN Gain | 650000  | 33 | 6 | 27 | 0.029 | 11 | 1 | 40057         |
| chr19:55,500,000-56,200,000   | q13.42          | CN Loss | 700000  | 33 | 6 | 27 | 0.029 | 46 | 0 |               |
| chr2:164,100,000-164,950,000  | q24.3           | CN Gain | 850000  | 33 | 6 | 27 | 0.029 | 1  | 0 |               |
| chr3:101,600,000-101,800,000  | q12.3           | CN Gain | 200000  | 33 | 6 | 27 | 0.029 | 1  | 0 |               |
| chr3:105,250,000-105,400,000  | q13.11          | CN Gain | 150000  | 33 | 6 | 27 | 0.029 | 2  | 1 | CBLB          |
| chr3:111,250,000-112,000,000  | q13.13 - q13.2  | CN Gain | 750000  | 33 | 6 | 27 | 0.029 | 13 | 0 |               |
| chr3:123,950,000-124,400,000  | q21.2           | CN Gain | 450000  | 33 | 6 | 27 | 0.029 | 2  | 0 |               |
| chr3:152,200,000-152,500,000  | q25.2           | CN Gain | 300000  | 33 | 6 | 27 | 0.029 | 0  | 0 |               |
| chr3:170,100,000-171,550,000  | q26.2 - q26.31  | CN Gain | 1450000 | 33 | 6 | 27 | 0.029 | 11 | 0 |               |
| chr3:179,000,000-179,100,000  | q26.33          | CN Gain | 100000  | 33 | 6 | 27 | 0.029 | 2  | 0 |               |
| chr3:23,300,000-24,950,000    | p24.3 - p24.2   | CN Gain | 1650000 | 33 | 6 | 27 | 0.029 | 11 | 0 |               |
| chr3:31,250,000-32,200,000    | p23 - p22.3     | CN Gain | 950000  | 33 | 6 | 27 | 0.029 | 5  | 0 |               |
| chr3:98,500,000-99,350,000    | q12.1           | CN Gain | 850000  | 33 | 6 | 27 | 0.029 | 2  | 0 |               |
| chr4:101,600,000-101,850,000  | q24             | CN Loss | 250000  | 33 | 6 | 27 | 0.029 | 0  | 0 |               |
| chr4:109,350,000-110,650,000  | q25             | CN Loss | 1300000 | 33 | 6 | 27 | 0.029 | 13 | 0 |               |
| chr4:115,050,000-116,300,000  | q26             | CN Loss | 1250000 | 33 | 6 | 27 | 0.029 | 3  | 0 |               |
| chr4:121,100,000-122,250,000  | q27             | CN Loss | 1150000 | 33 | 6 | 27 | 0.029 | 4  | 0 |               |
| chr4:130,000,000-130,350,000  | q28.2           | CN Loss | 350000  | 33 | 6 | 27 | 0.029 | 2  | 0 |               |
| chr4:130,900,000-131,200,000  | q28.2 - q28.3   | CN Loss | 300000  | 33 | 6 | 27 | 0.029 | 0  | 0 |               |
| chr4:132,450,000-132,550,000  | q28.3           | CN Loss | 100000  | 33 | 6 | 27 | 0.029 | 0  | 0 |               |
| chr4:14,800,000-15,450,000    | p15.33 - p15.32 | CN Loss | 650000  | 33 | 6 | 27 | 0.029 | 5  | 0 |               |
| chr4:141,500,000-142,100,000  | q31.21          | CN Gain | 600000  | 33 | 6 | 27 | 0.029 | 3  | 0 |               |
| chr4:147,100,000-147,250,000  | q31.22          | CN Loss | 150000  | 33 | 6 | 27 | 0.029 | 3  | 0 |               |
| chr4:147,900,000-149,500,000  | q31.22 - q31.23 | CN Loss | 1600000 | 33 | 6 | 27 | 0.029 | 7  | 0 |               |
| chr4:151,900,000-153,150,000  | q31.3           | CN Loss | 1250000 | 33 | 6 | 27 | 0.029 | 9  | 0 |               |
| chr4:165,650,000-166,650,000  | q32.3           | CN Loss | 1000000 | 33 | 6 | 27 | 0.029 | 12 | 0 |               |
| chr4:169,050,000-169,800,000  | q32.3           | CN Loss | 750000  | 33 | 6 | 27 | 0.029 | 4  | 0 |               |
| chr4:17,200,000-19,400,000    | p15.32 - p15.31 | CN Loss | 2200000 | 33 | 6 | 27 | 0.029 | 9  | 0 |               |
| chr4:2,500,000-4,600,000      | p16.3 - p16.2   | CN Loss | 2100000 | 33 | 6 | 27 | 0.029 | 28 | 0 |               |
| chr4:21,000,000-21,800,000    | p15.31 - p15.2  | CN Loss | 800000  | 33 | 6 | 27 | 0.029 | 3  | 0 |               |
| chr4:24,050,000-25,950,000    | p15.2           | CN Loss | 1900000 | 33 | 6 | 27 | 0.029 | 15 | 1 | SLC34A2       |
| chr4:27,000,000-27,650,000    | p15.2           | CN Loss | 650000  | 33 | 6 | 27 | 0.029 | 2  | 0 |               |
| chr4:34,100,000-36,400,000    | p15.1 - p14     | CN Loss | 2300000 | 33 | 6 | 27 | 0.029 | 4  | 0 |               |
| chr4:41,550,000-42,100,000    | p13             | CN Loss | 550000  | 33 | 6 | 27 | 0.029 | 6  | 1 | PHOX2B        |
| chr4:48,100,000-49,225,000    | p12 - p11       | CN Loss | 1125000 | 33 | 6 | 27 | 0.029 | 10 | 1 | TEC           |
| chr4:53,900,000-54,750,000    | q12             | CN Loss | 850000  | 33 | 6 | 27 | 0.029 | 6  | 1 | FIP1L1        |
| chr4:58,050,000-58,450,000    | q12             | CN Loss | 400000  | 33 | 6 | 27 | 0.029 | 2  | 0 |               |
| chr4:6,650,000-8,550,000      | p16.1           | CN Loss | 1900000 | 33 | 6 | 27 | 0.029 | 27 | 0 |               |
| chr4:60,700,000-66,350,000    | q13.1           | CN Loss | 5650000 | 33 | 6 | 27 | 0.029 | 7  | 0 |               |
| chr4:67,300,000-68,950,000    | q13.2           | CN Loss | 1650000 | 33 | 6 | 27 | 0.029 | 12 | 0 |               |
| chr4:69,800,000-71,450,000    | q13.2 - q13.3   | CN Loss | 1650000 | 33 | 6 | 27 | 0.029 | 28 | 0 |               |
| chr4:72,250,000-75,950,000    | q13.3           | CN Loss | 3700000 | 33 | 6 | 27 | 0.029 | 29 | 0 |               |
| chr4:76,400,000-76,550,000    | q21.1           | CN Loss | 150000  | 33 | 6 | 27 | 0.029 | 4  | 0 |               |
| chr4:77,700,000-77,800,000    | q21.1           | CN Loss | 100000  | 33 | 6 | 27 | 0.029 | 1  | 0 |               |
| chr4:79,750,000-79,850,000    | q21.21          | CN Loss | 100000  | 33 | 6 | 27 | 0.029 | 2  | 0 |               |
| chr4:83,200,000-85,600,000    | q21.22 - q21.23 | CN Loss | 2400000 | 33 | 6 | 27 | 0.029 | 25 | 0 |               |
| chr4:96,400,000-97,000,000    | q22.3           | CN Loss | 600000  | 33 | 6 | 27 | 0.029 | 2  | 0 |               |
| chr4:97,100,000-98,450,000    | q22.3           | CN Loss | 1350000 | 33 | 6 | 27 | 0.029 | 2  | 0 |               |
| chr4:99,000,000-100,950,000   | q23             | CN Loss | 1950000 | 33 | 6 | 27 | 0.029 | 25 | 1 | RAP1GDS1      |
| chr5:142,450,000-142,500,000  | q31.3           | CN Gain | 50000   | 33 | 6 | 27 | 0.029 | 1  | 1 | ARHGAP26      |
| chr5:16,450,000-19,900,000    | p15.1 - p14.3   | CN Gain | 3450000 | 33 | 6 | 27 | 0.029 | 14 | 0 |               |
| chr5:30,550,000-31,300,000    | p13.3           | CN Gain | 750000  | 33 | 6 | 27 | 0.029 | 1  | 0 |               |
| chr5:38,450,000-39,300,000    | p13.1           | CN Gain | 850000  | 33 | 6 | 27 | 0.029 | 10 | 1 | LIFR          |
| chr5:53,000,000-53,100,000    | q11.2           | CN Gain | 100000  | 33 | 6 | 27 | 0.029 | 1  | 0 |               |
| chr5:53,350,000-56,550,000    | q11.2           | CN Gain | 3200000 | 33 | 6 | 27 | 0.029 | 34 | 2 | IL6ST, MAP3K1 |
| chr5:66,200,000-67,400,000    | q12.3 - q13.1   | CN Gain | 1200000 | 33 | 6 | 27 | 0.029 | 5  | 0 |               |
| chr5:25,950,000-27,050,000    | p22.2 - p22.1   | CN Gain | 1100000 | 33 | 6 | 27 | 0.029 | 51 | 1 | HIST1H3B      |
| chr8:20,300,000-20,850,000    | p21.3           | CN Gain | 550000  | 33 | 6 | 27 | 0.029 | 3  | 0 |               |
| chr8:35,000,000-36,650,000    | p12 - p11.23    | CN Gain | 1650000 | 33 | 6 | 27 | 0.029 | 3  | 0 |               |
| chr9:108,350,000-108,400,000  | q31.2           | CN Loss | 50000   | 33 | 6 | 27 | 0.029 | 1  | 0 |               |
| chr9:109,350,000-109,950,000  | q31.2           | CN Loss | 600000  | 33 | 6 | 27 | 0.029 | 4  | 0 |               |
| chr9:114,950,000-115,450,000  | q32             | CN Loss | 500000  | 33 | 6 | 27 | 0.029 | 5  | 0 |               |
| chr9:73,250,000-73,550,000    | q21.12          | CN Loss | 300000  | 33 | 6 | 27 | 0.029 | 2  | 0 |               |
| chrX:2,000,000-2,075,000      | p22.33          | CN Loss | 75000   | 33 | 6 | 27 | 0.029 | 0  | 0 |               |
| chrX:29,200,000-31,050,000    | p21.3 - p21.2   | CN Loss | 1850000 | 33 | 6 | 27 | 0.029 | 11 | 0 |               |
| chrX:32,050,000-32,550,000    | p21.1           | CN Loss | 500000  | 33 | 6 | 27 | 0.029 | 1  | 0 |               |
| chrX:4,000,000-4,850,000      | p22.33 - p22.32 | CN Loss | 850000  | 33 | 6 | 27 | 0.029 | 1  | 0 |               |
| chrX:5,400,000-5,800,000      | p22.32          | CN Loss | 400000  | 33 | 6 | 27 | 0.029 | 0  | 0 |               |

|                               |                 |         |         |    |    |    |       |     |   |  |                 |
|-------------------------------|-----------------|---------|---------|----|----|----|-------|-----|---|--|-----------------|
| chr1:145,100,000-147,825,000  | q21.1 - q21.2   | CN Gain | 2725000 | 80 | 45 | 35 | 0.031 | 59  | 1 |  | BCL9            |
| chr1:156,100,000-156,200,000  | q22             | CN Gain | 100000  | 80 | 45 | 35 | 0.031 | 5   | 1 |  | LMNA            |
| chr8:112,550,000-113,150,000  | q23.3           | CN Gain | 600000  | 80 | 45 | 35 | 0.031 | 0   | 0 |  |                 |
| chr11:5,400,000-5,600,000     | p15.4           | CN Loss | 200000  | 47 | 16 | 31 | 0.038 | 11  | 0 |  |                 |
| chr14:78,750,000-79,000,000   | q24.3           | CN Loss | 250000  | 47 | 16 | 31 | 0.038 | 1   | 0 |  |                 |
| chr16:83,050,000-83,700,000   | q23.3           | CN Loss | 650000  | 47 | 16 | 31 | 0.038 | 2   | 0 |  |                 |
| chr16:86,200,000-86,500,000   | q24.1           | CN Loss | 300000  | 47 | 16 | 31 | 0.038 | 4   | 0 |  |                 |
| chr20:11,250,000-11,350,000   | p12.2           | CN Gain | 100000  | 47 | 16 | 31 | 0.038 | 1   | 0 |  |                 |
| chr20:32,150,000-35,850,000   | q11.22 - q11.23 | CN Gain | 3700000 | 47 | 16 | 31 | 0.038 | 74  | 0 |  |                 |
| chr20:9,700,000-10,250,000    | p12.2           | CN Gain | 550000  | 47 | 16 | 31 | 0.038 | 5   | 0 |  |                 |
| chr22:25,600,000-26,500,000   | q11.23 - q12.1  | CN Loss | 900000  | 47 | 16 | 31 | 0.038 | 8   | 0 |  |                 |
| chr22:27,125,000-27,600,000   | q12.1           | CN Loss | 475000  | 47 | 16 | 31 | 0.038 | 5   | 0 |  |                 |
| chr22:43,600,000-43,800,000   | q13.2           | CN Loss | 200000  | 47 | 16 | 31 | 0.038 | 4   | 0 |  |                 |
| chr22:44,150,000-44,700,000   | q13.2 - q13.31  | CN Loss | 550000  | 47 | 16 | 31 | 0.038 | 8   | 0 |  |                 |
| chr22:47,000,000-47,150,000   | q13.31          | CN Loss | 150000  | 47 | 16 | 31 | 0.038 | 2   | 0 |  |                 |
| chr3:148,450,000-148,700,000  | q24             | CN Gain | 250000  | 47 | 16 | 31 | 0.038 | 3   | 0 |  |                 |
| chr3:191,050,000-191,100,000  | q28             | CN Gain | 50000   | 47 | 16 | 31 | 0.038 | 1   | 0 |  |                 |
| chr3:196,350,000-198,022,430  | q29             | CN Gain | 1672430 | 47 | 16 | 31 | 0.038 | 29  | 0 |  |                 |
| chr5:24,400,000-25,900,000    | p14.2 - p14.1   | CN Gain | 1500000 | 47 | 16 | 31 | 0.038 | 4   | 1 |  | CDH10           |
| chr6:160,450,000-163,050,000  | q25.3 - q26     | CN Loss | 2600000 | 47 | 16 | 31 | 0.038 | 13  | 0 |  |                 |
| chr6:163,150,000-163,650,000  | q26             | CN Loss | 500000  | 47 | 16 | 31 | 0.038 | 3   | 0 |  |                 |
| chr6:163,950,000-164,500,000  | q26 - q27       | CN Loss | 550000  | 47 | 16 | 31 | 0.038 | 2   | 1 |  | QKI             |
| chr8:140,900,000-141,000,000  | q24.3           | CN Gain | 100000  | 47 | 16 | 31 | 0.038 | 1   | 0 |  |                 |
| chr8:21,850,000-22,600,000    | p21.3           | CN Gain | 750000  | 47 | 16 | 31 | 0.038 | 27  | 0 |  |                 |
| chr8:31,200,000-31,450,000    | p12             | CN Gain | 250000  | 47 | 16 | 31 | 0.038 | 0   | 0 |  |                 |
| chr8:32,750,000-33,450,000    | p12             | CN Gain | 700000  | 47 | 16 | 31 | 0.038 | 6   | 0 |  |                 |
| chr8:37,150,000-37,400,000    | p11.23          | CN Gain | 250000  | 47 | 16 | 31 | 0.038 | 3   | 0 |  |                 |
| chr8:51,150,000-51,900,000    | q11.21          | CN Gain | 750000  | 47 | 16 | 31 | 0.038 | 1   | 0 |  |                 |
| chr8:52,550,000-53,700,000    | q11.22 - q11.23 | CN Gain | 1150000 | 47 | 16 | 31 | 0.038 | 6   | 0 |  |                 |
| chr9:0-600,000                | p24.3           | CN Loss | 600000  | 47 | 16 | 31 | 0.038 | 15  | 0 |  |                 |
| chr9:119,450,000-120,450,000  | q33.1           | CN Loss | 1000000 | 47 | 16 | 31 | 0.038 | 4   | 0 |  |                 |
| chr9:137,550,000-138,800,000  | q34.3           | CN Loss | 1250000 | 47 | 16 | 31 | 0.038 | 28  | 0 |  |                 |
| chrX:117,200,000-117,400,000  | q24             | CN Loss | 200000  | 47 | 16 | 31 | 0.038 | 1   | 0 |  |                 |
| chrX:150,100,000-151,800,000  | q28             | CN Loss | 1700000 | 47 | 16 | 31 | 0.038 | 22  | 0 |  |                 |
| chrX:64,400,000-67,250,000    | q11.2 - q12     | CN Loss | 2850000 | 47 | 16 | 31 | 0.038 | 9   | 2 |  | MSN, AR         |
| chr12:120,700,000-121,850,000 | q24.31          | CN Gain | 1150000 | 53 | 19 | 34 | 0.038 | 31  | 1 |  | HNFI1A          |
| chr13:19,850,000-19,900,000   | q12.11          | CN Loss | 50000   | 53 | 19 | 34 | 0.038 | 1   | 0 |  |                 |
| chr22:35,500,000-35,550,000   | q12.3           | CN Loss | 50000   | 53 | 19 | 34 | 0.038 | 1   | 0 |  |                 |
| chr22:47,200,000-47,250,000   | q13.31          | CN Loss | 50000   | 53 | 19 | 34 | 0.038 | 1   | 0 |  |                 |
| chr22:50,300,000-50,450,000   | q13.33          | CN Loss | 150000  | 53 | 19 | 34 | 0.038 | 5   | 0 |  |                 |
| chr3:148,700,000-149,650,000  | q24 - q25.1     | CN Gain | 950000  | 53 | 19 | 34 | 0.038 | 14  | 1 |  | WWTR1           |
| chr8:142,450,000-143,050,000  | q24.3           | CN Gain | 600000  | 53 | 19 | 34 | 0.038 | 2   | 0 |  |                 |
| chr8:37,400,000-37,450,000    | p11.23          | CN Gain | 50000   | 53 | 19 | 34 | 0.038 | 0   | 0 |  |                 |
| chr8:51,950,000-52,550,000    | q11.21 - q11.22 | CN Gain | 600000  | 53 | 19 | 34 | 0.038 | 1   | 0 |  |                 |
| chr8:66,550,000-68,350,000    | q13.1 - q13.2   | CN Gain | 1800000 | 53 | 19 | 34 | 0.038 | 26  | 0 |  |                 |
| chr9:140,675,000-140,750,000  | q34.3           | CN Loss | 75000   | 53 | 19 | 34 | 0.038 | 3   | 0 |  |                 |
| chr9:7,100,000-8,550,000      | p24.1           | CN Loss | 1450000 | 53 | 19 | 34 | 0.038 | 3   | 1 |  | PTPRD           |
| chr3:134,400,000-134,450,000  | q22.2           | CN Loss | 50000   | 0  | 26 | 26 | 0.040 | 0   | 0 |  |                 |
| chr10:75,600,000-77,200,000   | q22.2           | CN Gain | 1600000 | 40 | 10 | 30 | 0.042 | 20  | 1 |  | KAT6B           |
| chr11:4,850,000-5,300,000     | p15.4           | CN Loss | 450000  | 40 | 10 | 30 | 0.042 | 24  | 0 |  |                 |
| chr12:103,500,000-103,950,000 | q23.2 - q23.3   | CN Loss | 450000  | 40 | 10 | 30 | 0.042 | 4   | 0 |  |                 |
| chr13:54,850,000-55,400,000   | q14.3 - q21.1   | CN Loss | 550000  | 40 | 10 | 30 | 0.042 | 1   | 0 |  |                 |
| chr14:79,300,000-79,400,000   | q31.1           | CN Loss | 100000  | 40 | 10 | 30 | 0.042 | 1   | 0 |  |                 |
| chr16:82,200,000-82,400,000   | q23.3           | CN Loss | 200000  | 40 | 10 | 30 | 0.042 | 1   | 0 |  |                 |
| chr17:72,950,000-73,950,000   | q25.1           | CN Gain | 1000000 | 40 | 10 | 30 | 0.042 | 41  | 1 |  | H3F3B           |
| chr19:51,650,000-54,300,000   | q13.41 - q13.42 | CN Loss | 2650000 | 40 | 10 | 30 | 0.042 | 147 | 2 |  | PPP2R1A, ZNF331 |
| chr19:56,300,000-57,050,000   | q13.43          | CN Loss | 750000  | 40 | 10 | 30 | 0.042 | 20  | 0 |  |                 |
| chr2:101,150,000-101,300,000  | q11.2           | CN Gain | 150000  | 40 | 10 | 30 | 0.042 | 2   | 0 |  |                 |
| chr20:36,000,000-36,100,000   | q11.23          | CN Gain | 100000  | 40 | 10 | 30 | 0.042 | 1   | 1 |  | SRC             |
| chr22:32,350,000-32,500,000   | q12.3           | CN Loss | 150000  | 40 | 10 | 30 | 0.042 | 3   | 0 |  |                 |
| chr22:35,650,000-36,950,000   | q12.3           | CN Loss | 1300000 | 40 | 10 | 30 | 0.042 | 20  | 1 |  | MYH9            |
| chr22:37,850,000-39,950,000   | q13.1           | CN Loss | 2100000 | 40 | 10 | 30 | 0.042 | 73  | 2 |  | APOBEC3B, PDGFB |
| chr22:43,350,000-43,400,000   | q13.2           | CN Loss | 50000   | 40 | 10 | 30 | 0.042 | 1   | 0 |  |                 |
| chr3:124,450,000-125,450,000  | q21.2           | CN Gain | 1000000 | 40 | 10 | 30 | 0.042 | 10  | 0 |  |                 |
| chr3:175,150,000-176,300,000  | q26.31 - q26.32 | CN Gain | 1150000 | 40 | 10 | 30 | 0.042 | 3   | 0 |  |                 |
| chr3:178,150,000-178,350,000  | q26.32          | CN Gain | 200000  | 40 | 10 | 30 | 0.042 | 3   | 0 |  |                 |
| chr4:10,150,000-11,150,000    | p16.1           | CN Loss | 1000000 | 40 | 10 | 30 | 0.042 | 2   | 0 |  |                 |
| chr4:11,750,000-14,450,000    | p15.33          | CN Loss | 2700000 | 40 | 10 | 30 | 0.042 | 11  | 0 |  |                 |
| chr4:147,350,000-147,900,000  | q31.22          | CN Loss | 550000  | 40 | 10 | 30 | 0.042 | 3   | 0 |  |                 |
| chr4:164,200,000-165,550,000  | q32.2 - q32.3   | CN Loss | 1350000 | 40 | 10 | 30 | 0.042 | 6   | 0 |  |                 |
| chr4:167,075,000-168,700,000  | q32.3           | CN Loss | 1625000 | 40 | 10 | 30 | 0.042 | 1   | 0 |  |                 |
| chr4:170,200,000-171,000,000  | q33             | CN Loss | 800000  | 40 | 10 | 30 | 0.042 | 7   | 0 |  |                 |
| chr4:182,300,000-186,050,000  | q34.3 - q35.1   | CN Loss | 3750000 | 40 | 10 | 30 | 0.042 | 34  | 1 |  | CASP3           |
| chr4:36,550,000-37,400,000    | p14             | CN Loss | 850000  | 40 | 10 | 30 | 0.042 | 4   | 0 |  |                 |
| chr4:37,500,000-37,550,000    | p14             | CN Loss | 50000   | 40 | 10 | 30 | 0.042 | 1   | 0 |  |                 |
| chr4:42,100,000-42,800,000    | p13             | CN Loss | 700000  | 40 | 10 | 30 | 0.042 | 4   | 0 |  |                 |
| chr4:43,500,000-43,800,000    | p13             | CN Loss | 300000  | 40 | 10 | 30 | 0.042 | 0   | 0 |  |                 |
| chr4:52,725,000-53,400,000    | q12             | CN Loss | 675000  | 40 | 10 | 30 | 0.042 | 5   | 0 |  |                 |
| chr4:66,450,000-67,150,000    | q13.1 - q13.2   | CN Loss | 700000  | 40 | 10 | 30 | 0.042 | 3   | 0 |  |                 |
| chr5:140,850,000-142,450,000  | q31.3           | CN Gain | 1600000 | 40 | 10 | 30 | 0.042 | 42  | 1 |  | ARHGAP26        |
| chr5:23,350,000-23,400,000    | p14.2           | CN Gain | 50000   | 40 | 10 | 30 | 0.042 | 0   | 0 |  |                 |
| chr5:26,500,000-27,500,000    | p14.1           | CN Gain | 1000000 | 40 | 10 | 30 | 0.042 | 2   | 0 |  |                 |
| chr5:67,450,000-67,550,000    | q13.1           | CN Gain | 100000  | 40 | 10 | 30 | 0.042 | 2   | 1 |  | PIK3R1          |
| chr6:103,400,000-104,300,000  | q16.3           | CN Loss | 900000  | 40 | 10 | 30 | 0.042 | 0   | 0 |  |                 |
| chr6:93,750,000-95,750,000    | q16.1           | CN Loss | 2000000 | 40 | 10 | 30 | 0.042 | 2   | 1 |  | EPHA7           |
| chr8:24,350,000-24,400,000    | p21.2           | CN Gain | 50000   | 40 | 10 | 30 | 0.042 | 3   | 0 |  |                 |
| chr8:34,000,000-34,800,000    | p12             | CN Gain | 800000  | 40 | 10 | 30 | 0.042 | 1   | 0 |  |                 |
| chr8:36,700,000-36,800,000    | p11.23          | CN Gain | 100000  | 40 | 10 | 30 | 0.042 | 1   | 0 |  |                 |
| chr9:106,700,000-106,800,000  | q31.1           | CN Loss | 100000  | 40 | 10 | 30 | 0.042 | 1   | 0 |  |                 |
| chr9:124,650,000-128,600,000  | q33.2 - q33.3   | CN Loss | 3950000 | 40 | 10 | 30 | 0.042 | 61  | 1 |  | PPP6C           |
| chr9:139,250,000-140,550,000  | q34.3           | CN Loss | 1300000 | 40 | 10 | 30 | 0.042 | 89  | 1 |  | NOTCH1          |
| chr9:73,600,000-74,200,000    | q21.12 - q21.13 | CN Loss | 600000  | 40 | 10 | 30 | 0.042 | 1   | 0 |  |                 |
| chrX:0-1,350,000              | p22.33          | CN Loss | 1350000 | 40 | 10 | 30 | 0.042 | 6   | 1 |  | CRLF2           |
| chrX:139,950,000-140,700,000  | q27.1 - q27.2   | CN Loss | 750000  | 40 | 10 | 30 | 0.042 | 14  | 0 |  |                 |
| chrX:14,950,000-18,900,000    | p22.2 - p22.13  | CN Loss | 3950000 | 40 | 10 | 30 | 0.042 | 38  | 1 |  | ZRSR2           |
| chrX:24,550,000-25,700,000    | p22.11 - p21.3  | CN Loss | 1150000 | 40 | 10 | 30 | 0.042 | 6   | 0 |  |                 |
| chrX:26,500,000-29,200,000    | p21.3           | CN Loss | 2700000 | 40 | 10 | 30 | 0.042 | 7   | 0 |  |                 |
| chrX:6,000,000-6,450,000      | p22.31          | CN Loss | 450000  | 40 | 10 | 30 | 0.042 | 3   | 0 |  |                 |
| chrX:7,650,000-8,250,000      | p22.31          | CN Loss | 600000  | 40 | 10 | 30 | 0.042 | 4   | 0 |  |                 |
| chrX:9,600,000-10,950,000     | p22.2           | CN Loss | 1350000 | 40 | 10 | 30 | 0.042 | 7   | 0 |  |                 |
| chr19:43,100,000-43,550,000   | q13.2 - q13.31  | CN Loss | 450000  | 60 | 26 | 34 | 0.048 | 9   | 0 |  |                 |
| chr22:34,350,000-35,400,000   | q12.3           | CN Loss | 1050000 | 60 | 26 | 34 | 0.048 | 1   | 0 |  |                 |
| chr22:47,250,000-47,300,000   | q13.31          | CN Loss | 50000   | 60 | 26 | 34 | 0.048 | 1   | 0 |  |                 |
| chr8:136,075,000-137,750,000  | q24.22 - q24.23 | CN Gain | 1675000 | 60 | 26 | 34 | 0.048 | 3   | 0 |  |                 |
| chr8:137,900,000-138,400,000  | q24.23          | CN Gain | 500000  | 60 | 26 | 34 | 0.048 | 1   | 0 |  |                 |
| chr8:138,500,000-138,750,000  | q24.23          | CN Gain | 250000  | 60 | 26 | 34 | 0.048 | 0   | 0 |  |                 |
| chr8:144,100                  |                 |         |         |    |    |    |       |     |   |  |                 |

|                               |                 |         |        |    |    |    |       |    |   |               |
|-------------------------------|-----------------|---------|--------|----|----|----|-------|----|---|---------------|
| chr12:120,250,000-120,700,000 | q24.23 - q24.31 | CN Gain | 450000 | 53 | 23 | 31 | 0.050 | 8  | 0 |               |
| chr12:121,850,000-122,575,000 | q24.31          | CN Gain | 725000 | 53 | 23 | 31 | 0.050 | 16 | 2 | SETD1B, BCL7A |
| chr13:19,750,000-19,850,000   | q12.11          | CN Loss | 100000 | 53 | 23 | 31 | 0.050 | 3  | 0 |               |
| chr22:34,100,000-34,350,000   | q12.3           | CN Loss | 250000 | 53 | 23 | 31 | 0.050 | 3  | 0 |               |
| chr8:139,050,000-139,400,000  | q24.23          | CN Gain | 350000 | 53 | 23 | 31 | 0.050 | 2  | 1 | FAM135B       |
| chr8:39,200,000-39,250,000    | p11.22          | CN Gain | 50000  | 53 | 23 | 31 | 0.050 | 1  | 0 |               |
| chr8:48,975,000-49,150,000    | q11.21          | CN Gain | 175000 | 53 | 23 | 31 | 0.050 | 1  | 0 |               |
| chr9:140,750,000-141,213,431  | q34.3           | CN Loss | 463431 | 53 | 23 | 31 | 0.050 | 6  | 0 |               |

**Supplementary table 3.** Enrichment of genes belonging to each pathway comparing PR-low to PR-high LGSOCs.

To determine whether known cancer genes affected within regions of significant CN differences comparing PR-low compared to PR-high LGSOCs (As shown in supplemental table 3: n=113/729 cancer genes listed in Cosmic) were enriched within common signalling pathways, pathway enrichment analysis was performed using Metascape pathway analysis. From our 113 affected gene list, the number of genes belonging to each cancer signalling pathway was determined. The top 5 cancer signalling pathways and associated Log10(P) value are shown here and visualised in figure 1c.

| Cancer signalling pathway                                                        | Number of protein encoding genes linked to pathway | Proteins                                                                                                                                                                                                    | Log10(P)     |
|----------------------------------------------------------------------------------|----------------------------------------------------|-------------------------------------------------------------------------------------------------------------------------------------------------------------------------------------------------------------|--------------|
| Diseases of signal transduction by growth factor receptors and second messengers | 23/433                                             | FGFR1,FLT3,KDR,KIT,LMNA,MSN,MYC,MYH9,NOTCH1,PDGFB,PDGFRA,PIK3R1,PPP2R1A,RAF1,SRC,TPR,ZMYM2,QKI,CNTRL,RNF43,FBXW7,RNF213,FIP1L1                                                                              | -18.92890833 |
| Peptidyl-tyrosine kinase phosphorylation and modification                        | 18/376                                             | ABL2,CBLB,EPHA7,FGFR1,FLT3,IL2,IL6ST,KDR,KIT,NTRK1,PDGFB,PDGFRA,PPP2R1A,PTPRC,MAP2K4,SRC,TEC,FBXW7,CDH10,CDH17,LATS2,LEF1,MYC,PIK3R1,RAF1,GATA3,ETV4,BRCA2,MDM4,LIFR,AR,PTPRD,FIP1L1,PPARG,SLC45A3,MYH9,MSN | -14.03020608 |
| Transcriptional dysregulation of Hippo-Merlin signaling                          | 12/180                                             | ELK4,ETV4,FLT3,H3-3A,H3-3B,MAX,MYC,NTRK1,PPARG,H3C2,ASPSCR1,SLC45A3,BRCA2,SRC,WRN,RECQL4,DEK,LEF1,BCL9,LMNA,RAD21,PPP2R1A,TPR,GATA3,ELF3,NOTCH1,AR,MYH9,DAXX,PPP6C,MDM4,MAP2K4,SETD1B                       | -11.13566843 |
| PI3K signaling                                                                   | 10/142                                             | FGFR1,FLT3,GATA3,KDR,KIT,NTRK1,PDGFB,PDGFRA,PIK3R1,SRC                                                                                                                                                      | -9.588748829 |

|                |        |                                                                                                       |              |
|----------------|--------|-------------------------------------------------------------------------------------------------------|--------------|
| MAPK signaling | 12/255 | CASP3,DAXX,ELK4,FGFR1,MAX,MAP3K1,MYC,NTRK1,PDGFB,PDGFRA,RAF1,MAP2K4,LMNA,PIK3R1,PRF1,CBLB,EPHA7,FBXW7 | -9.378039643 |
|----------------|--------|-------------------------------------------------------------------------------------------------------|--------------|
